# Supplementary material
Source: publisher site journal article supplement (https://www.spandidos-publications.com/6582/downloadSupplementary)
Supplement: Supplementary file 1 [file downloadSupplementary]

## Sheet: pathway
Table SII. ENZ and ADA-308 commonly regulated pathways using Gene Set Enrichment Analysis.
Pathway in ENZ and ADA common downregulated genes
term_id	adjusted_p_value	negative_log10_of_adjusted_p_value	term_size	query_size	intersection_size	effective_domain_size	intersections
HALLMARK_ANDROGEN_RESPONSE	3.17584e-20	19.4981	101	302	40	4384	ABCC4,ACSL3,ADAMTS1,AKAP12,ALDH1A3,ANKH,AZGP1,CDK6,CENPN,DHCR24,ELL2,ELOVL5,FKBP5,GSR,HOMER2,HPGD,INPP4B,IQGAP2,KLK2,KLK3,KRT19,MAF,NDRG1,NKX3-1,PLPP1,PMEPA1,PTPN21,RPS6KA3,SELENOP,SGK1,SMS,SORD,SPDEF,STK39,TARP,TMPRSS2,TNFAIP8,UAP1,UBE2J1,ZBTB10
HALLMARK_E2F_TARGETS	1.60803e-09	8.79371	200	302	41	4384	ASF1B,ATAD2,AURKA,AURKB,BIRC5,CDC25B,CDK1,CENPM,CTPS1,DCTPP1,DDX39A,DEPDC1,H2AX,H2AZ1,HMGB2,LBR,LMNB1,LYAR,MAD2L1,MCM2,MCM4,MCM5,MCM7,MSH2,MYBL2,NME1,PCNA,PLK1,POLD1,POLE4,PRDX4,PRIM2,PRPS1,RAD51AP1,RFC3,RNASEH2A,RRM2,SLBP,SNRPB,TBRG4,UNG
HALLMARK_MYC_TARGETS_V2	8.33723e-08	7.07898	58	302	19	4384	BYSL,DCTPP1,DUSP2,EXOSC5,HK2,HSPE1,MCM4,MCM5,NOP16,NOP2,PHB1,PLK1,PUS1,SLC19A1,SORD,SRM,TBRG4,TMEM97,UNG
HALLMARK_ESTROGEN_RESPONSE_LATE	0.000669958	3.17395	200	302	30	4384	AGR2,BLVRB,CDC6,CYP4F11,DHRS2,DNAJC1,DUSP2,ELOVL5,EMP2,FDFT1,FGFR3,FKBP5,FOS,GAL,GALE,HOMER2,IMPA2,KIF20A,KLF4,KRT19,NXT1,PERP,PKP3,PPIF,PRLR,RNASEH2A,SCARB1,SGK1,SORD,TSPAN13
HALLMARK_G2M_CHECKPOINT	0.00172673	2.76278	200	302	29	4384	AURKA,AURKB,BIRC5,CDC25B,CDC45,CDC6,CDK1,DDX39A,DTYMK,E2F1,EXO1,FBXO5,H2AX,H2AZ1,LBR,LMNB1,MAD2L1,MCM2,MCM5,MYBL2,ODC1,ORC5,PLK1,PRC1,PRIM2,RAD54L,SAP30,TTK,UCK2
HALLMARK_MYC_TARGETS_V1	0.0229848	1.63856	200	302	26	4384	CDC45,CTPS1,EIF3B,ERH,FBL,GOT2,H2AZ1,HSPE1,LSM7,MAD2L1,MCM2,MCM4,MCM5,MCM7,NME1,NOP16,ODC1,PABPC4,PCNA,PHB1,PRDX4,PSMA6,RFC4,SRM,TCP1,TYMS
term_id	adjusted_p_value	negative_log10_of_adjusted_p_value	term_size	query_size	intersection_size	effective_domain_size	intersections
REACTOME_ACTIVATION_OF_THE_PRE_REPLICATIVE_COMPLEX	1.6813e-08	7.77436	33	495	14	11013	CDC45,CDC6,CDT1,GMNN,MCM10,MCM2,MCM4,MCM5,MCM7,ORC1,ORC5,POLE4,PRIM1,PRIM2
REACTOME_DNA_STRAND_ELONGATION	2.32689e-06	5.63322	32	495	12	11013	CDC45,FEN1,MCM2,MCM4,MCM5,MCM7,PCNA,POLD1,PRIM1,PRIM2,RFC3,RFC4
REACTOME_CELL_CYCLE_MITOTIC	4.82587e-06	5.31642	561	495	56	11013	AURKA,AURKB,BIRC5,CDC25B,CDC45,CDC6,CDCA5,CDK1,CDK6,CDKN1C,CDT1,CENPM,CENPN,E2F1,FBXO5,FEN1,GMNN,H2AX,H2AZ1,H4C3,KIF20A,LBR,LMNB1,MAD2L1,MCM10,MCM2,MCM4,MCM5,MCM7,MYBL2,MZT2B,NCAPG,NCAPH,NUP35,ORC1,ORC5,PCNA,PKMYT1,PLK1,POLD1,POLE4,PRIM1,PRIM2,PSMA6,RANGAP1,RBX1,RCC1,RFC3,RFC4,RRM2,SGO1,TUBA1C,TUBA3D,TUBA3E,TYMS,ZWILCH
REACTOME_MITOTIC_G1_PHASE_AND_G1_S_TRANSITION	1.8031e-05	4.74398	149	495	24	11013	CDC45,CDC6,CDK1,CDK6,CDKN1C,CDT1,E2F1,FBXO5,GMNN,MCM10,MCM2,MCM4,MCM5,MCM7,MYBL2,ORC1,ORC5,PCNA,POLE4,PRIM1,PRIM2,PSMA6,RRM2,TYMS
REACTOME_CELL_CYCLE	1.99106e-05	4.70092	693	495	63	11013	AURKA,AURKB,BIRC5,CDC25B,CDC45,CDC6,CDCA5,CDK1,CDK6,CDKN1C,CDT1,CENPM,CENPN,CENPW,CENPX,E2F1,EXO1,FBXO5,FEN1,GMNN,H2AX,H2AZ1,H4C3,KIF20A,LBR,LMNB1,MAD2L1,MCM10,MCM2,MCM4,MCM5,MCM7,MYBL2,MZT2B,NCAPG,NCAPH,NUP35,OIP5,ORC1,ORC5,PCNA,PKMYT1,PLK1,POLD1,POLE4,PRIM1,PRIM2,PSMA6,RAD51,RANGAP1,RBX1,RCC1,RFC3,RFC4,RMI2,RRM2,SGO1,TERT,TUBA1C,TUBA3D,TUBA3E,TYMS,ZWILCH
REACTOME_INTERCONVERSION_OF_NUCLEOTIDE_DI_AND_TRIPHOSPHATES	0.000112016	3.95072	29	495	10	11013	CTPS1,DCTPP1,DTYMK,GSR,NME1,NME2,NME3,RRM2,TXNRD1,TYMS
REACTOME_G1_S_SPECIFIC_TRANSCRIPTION	0.000112016	3.95072	29	495	10	11013	CDC45,CDC6,CDK1,CDT1,E2F1,FBXO5,ORC1,PCNA,RRM2,TYMS
REACTOME_SYNTHESIS_OF_DNA	0.00015652	3.80543	121	495	20	11013	CDC45,CDC6,CDT1,FEN1,GMNN,MCM2,MCM4,MCM5,MCM7,ORC1,ORC5,PCNA,POLD1,POLE4,PRIM1,PRIM2,PSMA6,RBX1,RFC3,RFC4
REACTOME_ACTIVATION_OF_ATR_IN_RESPONSE_TO_REPLICATION_STRESS	0.000157377	3.80306	37	495	11	11013	CDC45,CDC6,MCM10,MCM2,MCM4,MCM5,MCM7,ORC1,ORC5,RFC3,RFC4
REACTOME_S_PHASE	0.000395423	3.40294	163	495	23	11013	CDC25B,CDC45,CDC6,CDCA5,CDT1,E2F1,FEN1,GMNN,MCM2,MCM4,MCM5,MCM7,ORC1,ORC5,PCNA,POLD1,POLE4,PRIM1,PRIM2,PSMA6,RBX1,RFC3,RFC4
REACTOME_DNA_REPLICATION	0.00142053	2.84755	188	495	24	11013	CDC45,CDC6,CDT1,FEN1,GMNN,H2AX,H2AZ1,H4C3,MCM10,MCM2,MCM4,MCM5,MCM7,ORC1,ORC5,PCNA,POLD1,POLE4,PRIM1,PRIM2,PSMA6,RBX1,RFC3,RFC4
REACTOME_LAGGING_STRAND_SYNTHESIS	0.00650408	2.18681	20	495	7	11013	FEN1,PCNA,POLD1,PRIM1,PRIM2,RFC3,RFC4
REACTOME_POLYMERASE_SWITCHING	0.00694671	2.15822	14	495	6	11013	PCNA,POLD1,PRIM1,PRIM2,RFC3,RFC4
REACTOME_METABOLISM_OF_NUCLEOTIDES	0.0101194	1.99485	97	495	15	11013	ADSS2,CTPS1,DCTPP1,DTYMK,GSR,IMPDH1,NME1,NME2,NME3,NUDT1,PNP,RRM2,TXNRD1,TYMS,UCK2
REACTOME_UNWINDING_OF_DNA	0.0430958	1.36557	12	495	5	11013	CDC45,MCM2,MCM4,MCM5,MCM7
term_id	adjusted_p_value	negative_log10_of_adjusted_p_value	term_size	query_size	intersection_size	effective_domain_size	intersections
KEGG_DNA_REPLICATION	4.8378e-07	6.31535	36	265	13	5245	FEN1,MCM2,MCM4,MCM5,MCM7,PCNA,POLD1,POLE4,PRIM1,PRIM2,RFC3,RFC4,RNASEH2A
KEGG_CELL_CYCLE	0.000739054	3.13132	125	265	19	5245	CDC25B,CDC45,CDC6,CDK1,CDK6,CDKN1C,E2F1,MAD2L1,MCM2,MCM4,MCM5,MCM7,ORC1,ORC5,PCNA,PKMYT1,PLK1,RBX1,TTK
KEGG_PYRIMIDINE_METABOLISM	0.00146299	2.83476	98	265	16	5245	CTPS1,DTYMK,NME1,NME1-NME2,NME2,NME3,PNP,POLD1,POLE4,POLR3K,PRIM1,PRIM2,RRM2,TXNRD1,TYMS,UCK2
KEGG_MISMATCH_REPAIR	0.0435986	1.36053	23	265	6	5245	EXO1,MSH2,PCNA,POLD1,RFC3,RFC4
term_id	adjusted_p_value	negative_log10_of_adjusted_p_value	term_size	query_size	intersection_size	effective_domain_size	intersections
KOBAYASHI_EGFR_SIGNALING_24HR_DN	3.73255e-34	33.428	251	706	63	21142	ASF1B,ATAD2,AURKA,AURKB,BIRC5,CARD10,CDC45,CDC6,CDCA4,CDK1,CDT1,CENPM,CENPN,CKLF,DDX39A,DEPDC1,DUSP4,E2F1,ELL2,EXO1,FEN1,GMNN,HMGB2,LMNB1,LMNB2,MAD2L1,MCM10,MCM2,MCM4,MCM5,MCM7,MSH2,MYBL2,NCAPG,NCAPH,NME1,ODC1,ORC1,PCNA,PHLDA2,PKMYT1,PLK1,POLR3K,PPIF,PRC1,PRIM1,PRPS1,RAD51,RAD51AP1,RANGAP1,RFC3,RFC4,RNASEH2A,RRM2,SHCBP1,SLCO4A1,SRM,TTK,TYMS,UCK2,UNG,WWTR1,ZWILCH
GOBERT_OLIGODENDROCYTE_DIFFERENTIATION_UP	1.50987e-32	31.8211	570	706	90	21142	AKAP12,ALDH16A1,ASF1B,ATAD2,AURKA,AURKB,BIRC5,BLVRB,CACNG4,CDC25B,CDC45,CDC6,CDCA2,CDCA4,CDCA5,CDCA7,CDK1,CDT1,CENPM,CENPN,CENPW,DCTPP1,DEPDC1,DEPDC1B,E2F1,E2F7,EXO1,FAM83D,FBXO5,FEN1,FGFR3,GMNN,GPATCH4,GPC6,HMGB2,IFRD2,IGF1R,IMPA2,ISOC1,KIF20A,LDHB,LMNB1,LMNB2,LRR1,LYAR,MAD2L1,MATR3,MCM10,MCM2,MCM4,MCM5,MCM7,MYBL2,NCAPG,NCAPH,ODC1,OIP5,ORC1,PKMYT1,PLK1,POLD1,PPIF,PRC1,PRIM1,PRIM2,RAD51,RAD51AP1,…
DUTERTRE_ESTRADIOL_RESPONSE_24HR_UP	4.94463e-29	28.3059	324	706	65	21142	ASF1B,ATAD2,AURKA,AURKB,BIRC5,CD320,CDC45,CDC6,CDCA2,CDCA4,CDCA5,CDCA7,CDK1,CDT1,CENPM,CENPN,DEPDC1B,DHRS2,E2F1,E2F7,EBP,ELOVL2,EXO1,EXOSC5,FAM83D,FBXO5,FEN1,FKBP5,GMNN,GREB1,IMPA2,LMNB1,LRR1,MCM10,MCM2,MCM4,MCM5,MCM7,MYBL2,NCAPG,NCAPH,NME1,NR2C2AP,PAQR4,PCNA,PKMYT1,PLK1,POLD1,PPIF,PRC1,PRIM1,RAD51,RAD54L,RFC3,RFC4,RNASEH2A,RRM2,SHCBP1,TMEM164,TTK,TYMS,UHRF1,UNG,ZNF367,ZWILCH
FISCHER_DREAM_TARGETS	9.26219e-29	28.0333	929	706	110	21142	AGPAT5,ASF1B,ATAD2,AURKA,AURKB,BCL2L12,BIRC5,BTG1,BYSL,CDC25B,CDC45,CDC6,CDCA2,CDCA4,CDCA5,CDCA7,CDK1,CDT1,CENPM,CENPN,CENPW,CKLF,CLN6,CYP51A1,DDX39A,DEPDC1,DEPDC1B,DTYMK,E2F1,E2F7,EAF2,EBP,EIF3B,EXO1,EXOSC5,FAM83D,FBXO5,FEN1,FKBP5,FRAT2,GGCT,GMNN,GPATCH4,GRK6,HMGB2,HNRNPAB,HSPE1,IFRD2,KIF20A,LBR,LMNB1,LRR1,LRRC45,MAD2L1,MAZ,MCM10,MCM2,MCM4,MCM5,MCM7,MSH2,MYBL2,NCAPG,NCAPH,NUDT1,NUP35,NXT1,OIP5,O…
NELSON_RESPONSE_TO_ANDROGEN_UP	1.64592e-27	26.7836	86	706	36	21142	ABCC4,ACSL3,ADAMTS1,AKAP12,ALDH1A3,ANKH,AZGP1,DHCR24,ELL2,ELOVL5,FKBP5,GSR,HES6,HOMER2,HPGD,INPP4B,IQGAP2,KLF4,KLK2,KLK3,KLK4,KRT19,MAF,NDRG1,NKX3-1,PMEPA1,PTPN21,SGK1,SMS,SORD,SPDEF,STK39,TMPRSS2,TNFAIP8,UAP1,ZBTB10
BERENJENO_TRANSFORMED_BY_RHOA_UP	7.18915e-27	26.1433	536	706	80	21142	ACTG2,ASF1B,AURKA,AURKB,BAX,BIRC5,BOP1,BYSL,CDC45,CDC6,CDCA4,CDCA5,CDCA7,CDK1,CDT1,DCTPP1,DTYMK,DUSP1,DUSP9,E2F1,EIF3B,ELL2,EXO1,FBL,FEN1,FRAT2,GMNN,GRK6,GSR,HK2,HMGB2,IFRD2,KIF20A,KLF4,LBR,LRRC59,MAD2L1,MCM10,MCM2,MCM4,MCM5,MCM7,MRPL12,MSH2,MYBL2,NCAPH,NME1,NOP2,NR4A1,NXT1,ODC1,ORC1,PCNA,PHLDB2,POLD1,POLR3K,PRC1,PRIM1,PRIM2,PTGER4,RAD51,RAD51AP1,RANGAP1,RCC1,RFC3,RFC4,RNASEH2A,RRS1,SAP30,SLBP,SR…
ZHANG_TLX_TARGETS_60HR_DN	1.06649e-26	25.972	277	706	58	21142	ASF1B,AURKB,BIRC5,CDC45,CDC6,CDCA5,CDCA7,CDT1,CENPM,CENPN,DCTPP1,ELOVL2,EXO1,FEN1,FKBP5,GMNN,HK2,HMGB2,IFRD2,LMNB1,LMNB2,LRR1,LYAR,MCM10,MCM2,MCM4,MCM5,MCM7,MYBL2,NCAPG,NRARP,ORC1,PLK1,POLD1,POLR3K,PRIM1,PRIM2,PRPS1,RAD51,RAD51AP1,RAD54L,RFC3,RFC4,RRM2,SDF2L1,SHCBP1,SLC2A3,SOAT1,SRM,TTK,TYMS,UCHL5,UCK2,UHRF1,UNG,WDR77,ZMYND19,ZWILCH
KRIGE_RESPONSE_TO_TOSEDOSTAT_24HR_DN	1.44718e-22	21.8395	1011	706	105	21142	ABCC4,BOP1,BYSL,BZW2,CCDC124,CCDC86,CD320,CDK6,CEBPA,CENPM,CENPW,CLN6,COL4A2,COX16,DCTPP1,DHCR24,DOHH,EBP,EIF3B,ENDOG,EXOSC5,FASN,FBL,FSCN1,GAL,GCAT,GMDS,GNB4,GNPNAT1,GOT2,GPATCH4,HES6,HSPB1,HSPBP1,HSPE1,IFRD2,IL17D,IL6R,IMP3,INF2,ISOC2,LDLRAD3,LRG1,LRP3,LSM7,LYAR,MAD2L1,MATR3,MAZ,MCAT,MGLL,MIF,MRPL12,MRPL14,MRPL41,MRPS12,MRPS26,MTFP1,NCLN,NME1,NOP16,NOP2,NPM3,NUP35,NXT1,PAK1IP1,PDCD2L,PNP,POLE4,…
BASAKI_YBX1_TARGETS_UP	4.41958e-22	21.3546	290	706	54	21142	ASF1B,AURKA,AURKB,BIRC5,CCM2,CDC42EP3,CDC6,CDK1,CENPM,CENPN,CENPW,DDX39A,DEPDC1,DEPDC1B,DTYMK,E2F7,EMP2,FAM83D,FBN1,FEN1,GLRX2,HMGB2,IFRD2,KIF20A,KRT80,LMNB2,LRR1,MAD2L1,MCM10,MCM2,MCM4,MCM5,MCM7,OIP5,PHLDB2,PLK1,PMEPA1,PRC1,RAD51,RANGAP1,RFC3,RRS1,SAC3D1,SHCBP1,SNAI2,THBS1,TOMM5,TYMS,UHRF1,UNG,WDR77,ZNF367,ZNF71,ZWILCH
WANG_RESPONSE_TO_GSK3_INHIBITOR_SB216763_DN	3.25097e-21	20.488	374	706	60	21142	ACSL3,ALDH1A3,ASF1B,ATAD2,BYSL,CCM2,CDC42EP3,CDC45,CDC6,CDCA4,CENPM,CYP51A1,DCTPP1,DHCR24,DLX1,E2F7,EBP,EMP2,EXO1,EXOSC5,FASN,FEN1,FOS,GMNN,GNB4,HNRNPAB,HSPE1,KIF21B,LBR,LYAR,MAD2L1,MCAT,MCM10,MCM2,MCM4,MCM5,MCM7,MIF,MRPS12,MSH2,MYBL2,NCAPG,NDRG1,NOP16,PKMYT1,PRPS1,RAD51,RAD51AP1,RAD54L,RFC3,RRM2,SDF2L1,SHCBP1,SLC2A3,SLCO4A1,TSFM,TYMS,UHRF1,UNG,ZNF367
SHEDDEN_LUNG_CANCER_POOR_SURVIVAL_A6	5.80606e-21	20.2361	456	706	66	21142	AGPAT5,ANGPT2,AP2S1,ATAD2,AURKA,AURKB,BIRC5,CDC45,CDC6,CDK1,CDT1,CENPM,CENPN,DEPDC1,DTYMK,DUSP9,EIF4A3,EXO1,F12,FBXO5,FOXG1,GPR37,HK2,HMGB2,KIF20A,LDHB,LMNB1,MAD2L1,MCM10,MCM4,MCM5,MIF,MRPL12,MYBL2,NCAPG,NCAPH,NME1,OIP5,ORC1,PCNA,PLOD2,PNP,PPIF,PRC1,PRIM1,PRIM2,PRPS1,PRR7,RAD51AP1,RAD54L,RFC3,RFC4,RRM2,SAP30,SHCBP1,SLBP,SLC25A10,SNRPB,SRM,TBRG4,TCP1,TOMM40,TTK,TUBA3D,TYMS,ZWILCH
WEI_MYCN_TARGETS_WITH_E_BOX	2.55404e-20	19.5928	795	706	88	21142	ABCC4,ALDH1A3,ATAD2,AURKB,BIRC5,BYSL,CDC6,CDCA5,CDK1,CLN6,CRLS1,CSK,CYP11A1,DAPK3,DCTPP1,DEPDC1,DEPDC1B,E2F7,EBP,EIF3B,ENDOD1,EPDR1,F2RL1,FAM83D,FASN,GGCT,GLRX2,GMNN,HK2,HPGD,HRAS,HTR3A,ISOC1,KCNMA1,LDLRAD3,LRR1,LYAR,MAD2L1,MCM10,MCM4,MRPL14,MRPL41,MRPS12,MRPS18C,MRPS2,MRPS28,MSH2,NME1-NME2,NME2,NOP16,NOP2,NR4A1,NUP35,ODC1,PDCD2L,PHLDA2,PNP,POLE4,POLR3K,POP1,PPIF,PRIM2,PRPS1,PUS1,RCC1,RFC3,RNF126…
SARRIO_EPITHELIAL_MESENCHYMAL_TRANSITION_UP	9.44218e-20	19.0249	180	706	41	21142	ARPC1B,ASF1B,CDC45,CDC6,CDCA5,CDCA7,CDK1,CENPW,E2F1,EXO1,FBXO5,GGCT,GMNN,HSPE1,MAD2L1,MCM2,MCM4,MCM5,MCM7,MFHAS1,MSH2,ODC1,PCNA,PKMYT1,PLK1,POLR3K,PRC1,PRIM1,RAD51,RFC3,RFC4,RRM2,RRS1,SDF2L1,SRXN1,TIMM10,TYMS,UCK2,UHRF1,YRDC,ZNF367
ROSTY_CERVICAL_CANCER_PROLIFERATION_CLUSTER	4.94899e-19	18.3055	140	706	36	21142	ASF1B,ATAD2,AURKA,AURKB,BIRC5,CDC6,CDK1,CENPM,DSG2,DTYMK,E2F1,EBP,FBXO5,FEN1,GMNN,HMGB2,KIF20A,LMNB1,MAD2L1,MCM10,MCM2,MCM4,MYBL2,NCAPG,NCAPH,OIP5,PAQR4,PCNA,PLK1,PRC1,RAD51AP1,RRM2,SAC3D1,SHCBP1,TTK,TYMS
WHITEFORD_PEDIATRIC_CANCER_MARKERS	8.32814e-19	18.0795	116	706	33	21142	ASF1B,ATAD2,AURKA,BIRC5,CDC45,CDCA2,CDCA5,CDCA7,CDK1,CDK6,CENPN,DTYMK,E2F1,LMNB2,MAD2L1,MCM4,MCM5,MCM7,MYBL2,NCAPH,NME1,NUDT1,ODC1,PCNA,PRC1,RFC3,RFC4,RNASEH2A,RRM2,TTK,TYMS,UHRF1,ZNF367
RUIZ_TNC_TARGETS_DN	8.36024e-19	18.0778	142	706	36	21142	ASF1B,ATAD2,AURKB,BIRC5,CCDC86,CDC42EP3,CDC45,CDC6,CDK1,DCTPP1,E2F1,EXO1,FEN1,GMNN,MAD2L1,MCM10,MCM2,MCM4,MCM5,MCM7,ODC1,OIP5,ORC1,PNP,POLR3K,PRIM1,PRPS1,RAD51AP1,RAD54L,RFC4,RRM2,SHCBP1,THBS1,TMEM97,TYMS,ZWILCH
VECCHI_GASTRIC_CANCER_EARLY_UP	4.91583e-18	17.3084	430	706	60	21142	APEX2,ARPC4,ATAD2,AURKA,BIRC5,BYSL,CDC25B,CDC6,CDCA2,CDCA5,CDCA7,CDK1,CDK6,CENPM,CENPN,CENPW,CLDN7,DEPDC1,DEPDC1B,E2F7,EIF3B,F12,FEN1,HSPB1,HSPE1,KIF20A,KLF5,LYAR,MAD2L1,MATR3,MCM10,MCM2,MCM4,MCM5,MCM7,MRPS28,MYBL2,NCAPG,NME1,NOP16,NSUN5,PFDN2,PMEPA1,POP1,PRC1,RAD51AP1,RFC3,RRM2,RRS1,SAC3D1,SNRPB,TIMM13,TM4SF1,TMED9,TRIM47,TTK,UHRF1,WDR77,ZNF367,ZNF511
SOTIRIOU_BREAST_CANCER_GRADE_1_VS_3_UP	7.90158e-18	17.1023	151	706	36	21142	AURKA,AURKB,BIRC5,BYSL,CDC45,CDK1,CENPN,DDX39A,E2F1,EXO1,FBXO5,FEN1,KIF20A,LMNB1,MAD2L1,MCM10,MCM2,MCM4,MRPL12,MYBL2,NCAPG,NCAPH,NME1,NUDT1,OIP5,PKMYT1,PLK1,PRC1,RAD51,RFC4,RNASEH2A,RRM2,TIMM10,TTK,TUBA1C,TXNRD1
BLUM_RESPONSE_TO_SALIRASIB_DN	8.74984e-18	17.058	342	706	53	21142	ANKH,AURKA,AURKB,CDC25B,CDC45,CDC6,CDK1,DDX39A,DHCR24,DTYMK,E2F1,EBP,EXO1,FASN,FBXO5,FEN1,FOS,FOXG1,GMNN,HSPB1,IQGAP2,KIF20A,MAD2L1,MCCC2,MCM2,MCM5,MSH2,MYBL2,NCAPG,ORC1,PCNA,PFKFB3,PLK1,PLOD2,POLD1,PRC1,PRIM1,PRPS1,RAD51,RAD51AP1,RBX1,RFC3,RFC4,RGS2,RIPK4,RNASEH2A,RRM2,SLC25A10,TNS3,TTK,TYMS,VGF,WWTR1
KINSEY_TARGETS_OF_EWSR1_FLII_FUSION_UP	1.04409e-17	16.9813	1278	706	111	21142	AHSG,AKAP12,ANKH,ASF1B,ASRGL1,ATAD2,AURKA,AURKB,BIRC5,BOP1,CCDC86,CDC45,CDC6,CDCA2,CDCA4,CDCA5,CDCA7,CDK1,CDT1,CENPM,CENPN,CLN6,CNTNAP2,DCTPP1,DDX39A,DEPDC1,DEPDC1B,DTYMK,E2F1,E2F7,EAF2,EBP,EMP2,EXO1,FAM83D,FBXO5,FEN1,GMNN,GNB4,HK2,HMGB2,HNRNPAB,IMPA2,ISOC1,LBH,LMNB1,LRR1,MAD2L1,MAFB,MATR3,MAZ,MCM10,MCM2,MCM4,MCM5,MCM7,MSH2,MYBL2,NCAPG,NCAPH,NUP35,OIP5,ORC1,ORC5,PAQR4,PCNA,PGLYRP2,PKMYT1,PKP1,PLK…
BURTON_ADIPOGENESIS_3	1.56403e-17	16.8058	101	706	30	21142	ASF1B,AURKA,BIRC5,CDC45,CDC6,CDCA7,CDK1,DTYMK,FEN1,HMGB2,KIF20A,KLF5,MAD2L1,MCM10,MCM2,MCM4,MCM5,MCM7,NCAPH,PCNA,PLK1,PNP,PRC1,PRIM1,RAD51,RAD51AP1,RRM2,SLBP,TTK,TYMS
MANALO_HYPOXIA_DN	3.29378e-17	16.4823	289	706	48	21142	ASF1B,BOP1,BYSL,CDC6,CDK1,CENPN,DHCR24,EXO1,FASN,FBXO5,FEN1,GLRX2,GMNN,LMNB2,MAD2L1,MAZ,MCM10,MCM2,MCM4,MCM5,MRPS12,NCLN,NME1,NOP16,ODC1,OIP5,PAK1IP1,PCYT2,PKMYT1,POLR3K,PPIF,PRC1,PRPS1,PUS1,RAD51,RAD51AP1,RFC3,RRM2,RRS1,SHCBP1,SLC19A1,SLC25A10,SLCO4A1,SRM,TSFM,UCHL5,WDR77,ZWILCH
HORIUCHI_WTAP_TARGETS_DN	1.15499e-16	15.9374	310	706	49	21142	ANGPT2,ASF1B,AURKA,AURKB,BIRC5,CCDC86,CDC25B,CDCA2,CDK1,CENPM,CENPN,CENPW,CSK,DEPDC1,FAM83D,FASN,FBL,FDFT1,GMNN,GNG10,GSR,HMGB2,KIF20A,LBR,LDHB,LMNB1,LMNB2,MAD2L1,MCM7,MYBL2,NCAPG,NRARP,ODC1,OIP5,PLK1,POLD1,PRC1,RAB3B,RAD51AP1,RRM2,SLC25A5,STUB1,TAF10,TMEM97,TTK,TYMS,UHRF1,UNG,WWTR1
CAIRO_HEPATOBLASTOMA_CLASSES_UP	4.20907e-16	15.3758	605	706	69	21142	ACSL3,AGPAT5,AURKA,AURKB,BIRC5,BOP1,BYSL,BZW2,CDC6,CDCA4,CDK1,CDT1,CENPN,CKLF,DDX39A,DTYMK,DUSP9,EIF3B,EIF4A3,FBL,FBXO5,GGCT,GRK6,HMGB2,HTRA2,KIF20A,KRT19,LRRC59,MAD2L1,MAZ,MCM10,MCM2,MCM4,MCM7,MIF,MRPL12,MSH2,NCAPG,NCLN,NME1,NOP16,NPM3,NR2F6,ODC1,OIP5,PABPC4,PLK1,POLD1,PRC1,PRDX4,PUS1,RAD51AP1,RBX1,RCC1,RFC4,RNASEH2A,RNF126,RRM2,RRS1,SEC61G,SLCO4A1,SNRPB,SRSF9,SUPT4H1,TBRG4,TMEM97,TTK,WDR77,ZWIL…
WONG_EMBRYONIC_STEM_CELL_CORE	6.00734e-16	15.2213	335	706	50	21142	AURKA,AURKB,BAX,BIRC5,CDC6,CDCA5,CDCA7,CDK1,CDKN1C,DTYMK,EXO1,FBL,GMNN,GNA14,HMGB2,HNRNPAB,HSPE1,KIF20A,LMNB1,MAD2L1,MCM2,MCM4,MCM5,MCM7,MRPL12,MRPS2,MRPS28,MSH2,MYBL2,NCAPH,NME2,NOP2,ORC1,PCNA,PLK1,POLD1,POLR3K,PRIM1,PRIM2,PRPS1,PUS1,RCC1,RFC3,RRM2,SLC25A5,TIMM13,TTK,UQCR11,WDR77,ZIC3
GRAHAM_CML_DIVIDING_VS_NORMAL_QUIESCENT_UP	6.06511e-16	15.2172	181	706	37	21142	ABCC4,AURKA,AURKB,BIRC5,CDC45,CDC6,CDK1,CENPM,FBXO5,FEN1,GMNN,KIF20A,LRRC59,MAD2L1,MCM10,MCM2,MCM4,MCM5,MRPS28,NCAPG,NPM3,NUDT1,OIP5,PPIF,PRC1,PRDX4,RAD51,RAD51AP1,RFC3,RFC4,RNASEH2A,RRM2,SAC3D1,SORD,STK39,TTK,TYMS
CHANG_CYCLING_GENES	3.09035e-15	14.51	148	706	33	21142	ADAMTS1,ASF1B,ATAD2,AURKA,BIRC5,CDC6,CDCA5,CDCA7,CDK1,CENPM,DEPDC1,DEPDC1B,E2F1,EXO1,FAM83D,FEN1,GMNN,LMNB1,LYAR,MAD2L1,MCM4,MCM5,NCAPH,PCNA,PLK1,POC1A,PRIM1,PRIM2,RAD51AP1,RANGAP1,RFC4,RRM2,UHRF1
GRAHAM_NORMAL_QUIESCENT_VS_NORMAL_DIVIDING_DN	4.94896e-15	14.3055	87	706	26	21142	BIRC5,CDC45,CDC6,CDK1,CENPM,FEN1,GMNN,MAD2L1,MCM10,MCM2,MCM4,MCM5,MSH2,NCAPG,NPM3,OIP5,PCNA,PPIF,PRC1,RAD51AP1,RFC3,RFC4,RNASEH2A,RRM2,SAC3D1,TYMS
LINDGREN_BLADDER_CANCER_CLUSTER_3_UP	8.06495e-15	14.0934	329	706	48	21142	AKAP12,ATAD2,AURKA,BIRC5,BLVRB,CDC45,CDC6,CDK1,CDT1,CENPN,DEPDC1,E2F1,EBP,EXO1,FAM83D,GGCT,GMNN,HMGB2,IMPA2,MAD2L1,MCM4,MCM5,MRPS12,MSH2,MYBL2,ORC1,PAK1IP1,PCNA,PDXP,PIK3AP1,PLK1,POC1A,PRC1,PRDX4,RAD51,RAD54L,RFC3,RFC4,RMI2,RNASEH2A,RRM2,SAC3D1,SOAT1,TM4SF1,TMEM97,TXNRD1,TYMS,UCK2
BENPORATH_PROLIFERATION	2.15496e-14	13.6666	147	706	32	21142	ATAD2,AURKA,BIRC5,CDCA5,CDCA7,CDK1,CDT1,CENPM,CENPN,DTYMK,EXO1,GGCT,GNB4,LBR,MAD2L1,MCM2,MSH2,MYBL2,NCAPG,PCNA,PFDN2,PKMYT1,PRC1,PRIM2,RAD51,RAD51AP1,RAD54L,RFC4,RRM2,SLC25A5,TTK,TYMS
KRIGE_RESPONSE_TO_TOSEDOSTAT_6HR_DN	2.85699e-14	13.5441	911	706	84	21142	BZW2,CCDC124,CCDC86,CEBPA,CENPM,CENPW,COL4A2,COX16,DCTPP1,DHCR24,DOHH,DUSP4,EBP,EIF3B,ENDOG,FASN,FSCN1,GCAT,GNB4,GNPNAT1,GOT2,GPATCH4,HES6,HSPB1,HSPBP1,HSPE1,IL17D,IL6R,IMP3,INF2,LDLRAD3,LRG1,LRP3,LSM7,LYAR,MAD2L1,MATR3,MAZ,MCAT,MGLL,MIF,MRPL12,MRPL14,MRPL41,MRPS12,MRPS26,MTFP1,NOP16,NOP2,NUP35,PAK1IP1,PHLDA2,PNP,POLE4,POP1,PRDX4,PRPS1,PRR7,RANGAP1,RCC1,RNF126,RPIA,RRS1,SCARB1,SCO2,SDF2L1,SLC19A1…
LEE_BMP2_TARGETS_DN	1.42364e-13	12.8466	882	706	81	21142	AGPAT5,APLN,ASF1B,ATAD2,AURKA,BOP1,BYSL,CCDC86,CDC45,CDC6,CDCA7,CDT1,CENPW,CYP11A1,CYP51A1,DCTPP1,DDX39A,DUSP9,E2F7,ELOVL2,EXO1,FEN1,FKBP5,FSCN1,GMNN,HK2,HNRNPAB,HTRA2,KLF5,LMNB2,LRR1,LRRC59,LYAR,MAD2L1,MATR3,MCM10,MCM2,MCM4,MCM5,MCM7,MCTP2,MGAT2,MRPS2,NME1,NOP16,NOP2,NUP35,ODC1,PDXP,PHLDA2,POLE4,POLR3K,POP1,PPIF,PRPS1,PRSS12,RAB32,RAD51,RAD51AP1,RCC1,RRM2,RRS1,SDF2L1,SLC19A1,SLC25A32,SLC2A3,SRM,…
FUJII_YBX1_TARGETS_DN	1.91497e-13	12.7178	202	706	36	21142	ASF1B,ATAD2,CDC6,CDCA7,CDT1,CENPN,DEPDC1,DEPDC1B,DTYMK,E2F7,EXO1,FBXO5,FEN1,LMNB1,MAD2L1,MCM10,MCM2,MCM4,MCM5,MCM7,MYBL2,NCAPH,ODC1,OIP5,PRIM1,RAD51,RFC3,RFC4,RNASEH2A,RRM2,SHCBP1,SLC25A32,TARP,UHRF1,UNG,ZNF367
BENPORATH_CYCLING_GENES	2.29001e-13	12.6402	648	706	67	21142	ADAMTS1,AKIRIN2,APEX2,ASF1B,ATAD2,AURKA,AURKB,BIRC5,CDC25B,CDC45,CDC6,CDCA7,CENPM,CSGALNACT1,DEPDC1B,DUSP4,E2F1,EXO1,FADD,FAM83D,FEN1,GMNN,GRK6,HMGB2,HRAS,HSD17B11,KLF6,LBR,LMNB1,LYAR,MAD2L1,MCM2,MCM4,MCM5,MED31,MGAT2,MRPS2,MSH2,NCAPH,NNMT,ORC1,PAK1IP1,PCNA,PDXP,PKMYT1,PLK1,POC1A,PRC1,PRIM1,PRIM2,RAD51,RAD51AP1,RAD54L,RANGAP1,RFC4,RNF126,RRM2,SAP30,SGK1,SHCBP1,SLBP,TSKU,TTK,TXNRD1,TYMS,UHRF1,UNG
KANG_DOXORUBICIN_RESISTANCE_UP	3.15741e-13	12.5007	54	706	20	21142	ASF1B,ATAD2,AURKA,BIRC5,CDC6,CDK1,CENPM,DTYMK,HMGB2,LMNB1,MAD2L1,MCM4,NCAPG,OIP5,PLK1,PRC1,RAD51AP1,RFC4,RRM2,TYMS
ZHOU_CELL_CYCLE_GENES_IN_IR_RESPONSE_6HR	4.13208e-13	12.3838	85	706	24	21142	CDCA5,CDT1,DCTPP1,DTYMK,E2F1,EXO1,FBXO5,GMNN,HMGB2,KIF20A,LBR,LMNB1,MAD2L1,MCM2,MCM5,MCM7,MYBL2,POC1A,RAD51,RAD54L,RFC4,SAP30,TTK,UHRF1
CASORELLI_ACUTE_PROMYELOCYTIC_LEUKEMIA_DN	7.23768e-13	12.1404	663	706	67	21142	ABCC4,ACSL3,APOL3,ARPC4,AURKA,AURKB,BAX,BIRC5,CDC45,CDC6,CDK1,CENPM,CLN6,CYP51A1,DHCR24,DPP4,DSG2,EBP,EIF3B,ELOVL5,FAM174B,FBN1,FDFT1,FEN1,FZD5,GALE,GGCT,GNAI1,HNRNPAB,HPGD,INPP4B,KIF20A,LDHB,LMNB2,LOX,MCM2,MCM4,MCM5,MCM7,MRPL12,NCAPG,NCAPH,NME1,NUDT1,ODC1,ORC1,PCYT2,PLK1,PLOD2,PRC1,PRDX4,PUS1,RAD54L,RANGAP1,RFC3,RFC4,RRM2,SMS,SNRPB,SRSF9,STOM,THBS1,TIMM10,TMEM97,TTLL12,TYMS,VWF
CHIANG_LIVER_CANCER_SUBCLASS_PROLIFERATION_UP	1.06504e-12	11.9726	178	706	33	21142	ASRGL1,AURKA,AURKB,BIRC5,CDC6,CDCA5,CDCA7,CDK1,DEPDC1,DEPDC1B,DUSP9,ELOVL7,FBXO5,FEN1,GALNT7,HK2,HMGB2,KIF20A,LDLRAD3,LMNB1,MAD2L1,MCM2,NCAPG,OIP5,PDE9A,PNMA1,PRC1,RAD51AP1,RFC4,RMI2,S100P,SHCBP1,TTK
ISHIDA_E2F_TARGETS	3.60032e-12	11.4437	53	706	19	21142	ASF1B,AURKB,CDCA7,CDK1,CDT1,DCTPP1,FEN1,HMGB2,LBR,MCM7,NCAPH,PCNA,PRC1,PRIM1,RAD51,RFC3,RRM2,SLBP,TYMS
MUELLER_PLURINET	3.88124e-12	11.411	299	706	42	21142	AURKA,AURKB,BIRC5,BYSL,CDC45,CDK1,CDT1,DCTPP1,DHCR24,EXO1,FBL,FEN1,GMNN,GOT2,HNRNPAB,HSPE1,LCK,LSM7,MCM10,MCM2,MCM4,MCM5,MRPS12,MSH2,MYBL2,NME1,NME1-NME2,NUDT1,ORC1,PCNA,PNP,POLD1,POP1,PSMA6,RAD51,RAD54L,RFC3,RFC4,SLC19A1,SNRPB,UNG,WDR77
DUTERTRE_ESTRADIOL_RESPONSE_6HR_UP	1.13314e-11	10.9457	229	706	36	21142	ANKH,BLVRB,CDC45,CDC6,CDCA7,E2F1,ELOVL2,ENDOD1,EXO1,EXOSC5,FEN1,FKBP5,GREB1,ISOC1,LDLRAD3,LYAR,MCM10,MCM2,MCM4,MCM5,MCM7,NOP2,NR2C2AP,PCNA,PLOD2,PPIF,PRIM1,RFC3,RRS1,SCARB1,SGK1,TGM2,TMEM164,UHRF1,UNG,ZNF367
TARTE_PLASMA_CELL_VS_PLASMABLAST_DN	1.25062e-11	10.9029	309	706	42	21142	ACTA2,ANG,BOP1,BYSL,CDC25B,CDC6,CDK1,COASY,DDX39A,DHCR24,DTYMK,EBP,FASN,FDFT1,HMGB2,HPGD,HSPE1,IGF1,IQGAP2,LBR,LDHB,LMNB1,MAD2L1,MRPL12,NME1,ORC1,PCNA,PNP,PPIF,PRIM1,RFC3,RFC4,RRM2,SGK1,SLC19A1,TAX1BP3,TCP1,TKT,TMEM97,TTK,TYMS,UCK2
CROONQUIST_IL6_DEPRIVATION_DN	1.40931e-11	10.851	98	706	24	21142	AURKA,AURKB,CDC45,CDC6,CDK1,DTYMK,GALE,HMGB2,LMNB1,MAD2L1,MCM2,MCM4,MCM7,MYBL2,NCAPH,OIP5,PCNA,PLK1,POLD1,RFC3,RFC4,RRM2,TTK,TYMS
CROONQUIST_NRAS_SIGNALING_DN	1.44381e-11	10.8405	72	706	21	21142	AURKA,AURKB,CDC6,CDK1,EXO1,GALE,GNAI1,HMGB2,LMNB1,MCM2,MCM4,MCM7,MYBL2,NCAPH,OIP5,PCNA,PLK1,PLOD2,POLD1,RFC3,RFC4
ZHOU_CELL_CYCLE_GENES_IN_IR_RESPONSE_24HR	1.64924e-11	10.7827	128	706	27	21142	BIRC5,CDK1,CENPN,CLN6,DCTPP1,DEPDC1,DTYMK,E2F1,EXO1,FBXO5,HMGB2,KIF20A,LBR,LMNB1,MAD2L1,MCM2,MCM7,MYBL2,NUP35,PCNA,POC1A,POLD1,PRC1,RAD54L,RFC4,TTK,UHRF1
TIEN_INTESTINE_PROBIOTICS_24HR_UP	2.00057e-11	10.6988	557	706	58	21142	AGPAT5,APOD,AURKA,CCDC86,CDC42EP3,CENPN,CKLF,DCTPP1,DHCR24,EBP,EIF4A3,ENDOD1,ERH,FBXO5,FEN1,GMNN,HNRNPAB,HPGD,HSPE1,IMPA2,ISOC1,KIF20A,LMNB2,LSM7,MAD2L1,MCM2,MCM4,MCM5,MCM7,MRPS2,MRPS28,NCAPH,NME1,NUDT1,PCNA,PFKFB3,PLK1,POLR3K,PPIF,PRC1,PSMA6,RAD51AP1,RBX1,RFC3,RRM2,SAC3D1,SGK1,SHCBP1,SLBP,TAGLN2,TAX1BP3,TBRG4,TIMM13,TM4SF1,TMEM109,TNS3,TYMS,UNG
NUYTTEN_EZH2_TARGETS_DN	2.55613e-11	10.5924	1024	706	84	21142	ASRGL1,ATAD2,AURKA,AURKB,BCL2L12,BIRC5,CCM2,CD320,CDC45,CDCA5,CDCA7,CDK1,CDT1,CENPM,CENPN,CENPW,CMTM8,CSGALNACT1,DDX39A,DEPDC1,DEPDC1B,DOCK8,DTYMK,EXO1,F12,F2RL1,FAM83D,FBL,FKBP5,GMNN,GPATCH4,GRK6,HES1,HMGB2,HPSE,HSD17B11,IMPA2,IMPDH1,INPP4B,ISOC1,KIF20A,LBR,LMNB1,MALT1,MCM10,MCM2,MCM4,MCM7,MESP1,NCAPH,NR2C2AP,NUDT1,NXT1,OIP5,ORC5,PDCD2L,PLK1,PNMA1,POC1A,POLD1,PPP1R35,PRC1,PRIM1,RAD51,RAD51AP1,RA…
MARKEY_RB1_ACUTE_LOF_UP	2.57411e-11	10.5894	235	706	36	21142	ASF1B,AURKA,BIRC5,CDC45,CDC6,CDCA5,CDK1,CDT1,DCTPP1,DLX1,DOHH,DTYMK,E2F1,GMNN,HMGB2,IFRD2,IGF1R,KIF20A,MAD2L1,MCM4,MCM5,MCM7,PABPC4,PCNA,PERP,PLK1,PRC1,PRIM1,PTGER4,RAD51,RAD51AP1,RFC4,RRM2,SMAD6,TYMS,WWTR1
SMID_BREAST_CANCER_BASAL_UP	3.43141e-11	10.4645	648	706	63	21142	ACTG2,ACTL8,ARPC4,ATAD2,BIRC5,BOP1,BYSL,CDC45,CDK1,CDT1,CENPN,CLEC7A,COL4A2,CRYAB,DSG1,DSG2,DUSP9,EXO1,FSCN1,GAL,GBP1,GMDS,GPR37,HPSE,IMPA2,KLF5,KLF6,KRT14,LAD1,LBR,LDHB,LOX,MALL,MCM10,MCM2,MCM4,MCM5,MCM7,MRPS12,MYBL2,NCAPH,NDRG1,NUDT1,ODC1,ORC1,PAK1IP1,PDE9A,PERP,PKP1,PLOD2,RAD51AP1,RAD54L,RGS2,RIPK4,SHCBP1,SLC2A3,TAGLN2,TM4SF1,TRIM2,TTK,TYMS,UCK2,WWTR1
BUYTAERT_PHOTODYNAMIC_THERAPY_STRESS_DN	5.2942e-11	10.2762	637	706	62	21142	APEX2,AURKA,AURKB,BIRC5,CARD10,CDC42EP3,CDCA4,CDK1,CKLF,CLN6,COL4A2,COX16,DCTPP1,DPM3,DTYMK,E2F1,EBP,ENDOD1,ENDOG,EXO1,FBN1,FBXO5,GBP1,HES1,HK2,IMP3,INTS5,ISOC1,ISOC2,KIF20A,LBH,LMNB1,LMNB2,MALL,MCAT,MCCC2,MCM10,MYL9,NME3,NNMT,NUDT1,ORC1,PAQR4,POLR3K,PRIM1,RFC3,RRM2,RRS1,SAC3D1,SCAND1,SPARC,TGFBR2,TGM2,THAP11,THBS1,TIMM10,TMEM109,TMEM160,TNS3,TTLL12,UQCR10,WDR77
DODD_NASOPHARYNGEAL_CARCINOMA_DN	5.50105e-11	10.2596	1375	706	101	21142	ACTA2,AKIRIN2,ANGPT2,ATAD2,AURKA,BIRC5,BZW2,CDC45,CDC6,CDCA2,CDCA5,CDCA7,CDK1,CENPN,CNTNAP2,COL4A2,CRISPLD2,CRLS1,DDX39A,DEGS1,DEPDC1,DEPDC1B,DSG2,DTYMK,E2F1,EIF3B,EXO1,EXOSC5,FBL,FBN1,FBXO5,FEN1,FKBP5,FSCN1,GBP1,GGCT,GMNN,HMGB2,HNRNPAB,HSPE1,KCNMA1,KIF20A,KREMEN2,LMNB1,LMNB2,LRR1,LYAR,MAD2L1,MARS2,MCCC2,MCM10,MCM2,MCM4,MCM7,MSH2,NCAPG,NCAPH,NME1,NOP16,NOP2,NUDT1,NUP35,NXT1,OIP5,ORC5,PCNA,PFDN2,P…
PUJANA_CHEK2_PCC_NETWORK	5.92119e-11	10.2276	779	706	70	21142	AURKA,AURKB,BOP1,CDC45,CDC6,CDK1,CDT1,DDX39A,DTYMK,EIF4A3,ERH,EXO1,FBL,FDFT1,FEN1,GSR,HK2,HMGB2,HNRNPAB,HSPE1,JTB,LBR,LCK,LDHB,LMNB1,LMNB2,LSM7,MAD2L1,MCM2,MCM4,MCM5,MCM7,MIF,MSH2,MYBL2,NME1,NOP16,NOP2,NPM3,NUDT1,ODC1,OIP5,ORC5,PCNA,PLK1,PRPS1,PSMA6,RAD51AP1,RAD54L,RCC1,RFC3,RFC4,RNASEH2A,RNF126,RPIA,RRM2,RRS1,SEC61G,SLBP,SLC25A5,SNRPB,SRSF9,TCP1,TOMM40,TP53TG1,TTK,TYMS,UCK2,UNG,WDR77
MARSON_BOUND_BY_E2F4_UNSTIMULATED	6.95396e-11	10.1578	728	706	67	21142	ANKH,APEX2,ASF1B,AURKA,AURKB,BICD2,BIRC5,CCM2,CDC45,CDC6,CDCA2,CDCA5,CDCA7,CDK1,CDT1,CENPM,CENPN,DEPDC1,DEPDC1B,E2F1,EXO1,FADD,FBXO5,FEN1,IMP3,KIF20A,LRR1,MAD2L1,MARS2,MATR3,MCM10,MCM4,MCM5,MCM7,MRPS12,MRPS18C,MSH2,MYBL2,NCAPH,NXT1,ORC1,PLK1,POC1A,POLE4,PRC1,PRIM1,PRIM2,RAD51,RAD51AP1,RAD54L,RANGAP1,RASSF3,RFC4,RPUSD1,RRM2,RRS1,SHCBP1,SLBP,SLC25A10,TCP1,TTK,TXNDC12,UHRF1,UNG,ZMYND19,ZNF367,ZWILCH
RHEIN_ALL_GLUCOCORTICOID_THERAPY_DN	1.64228e-10	9.78455	362	706	44	21142	AKAP12,BIRC5,BZW2,CDK1,CENPN,FBL,FBXL14,FOS,GGCT,GMNN,GNAI1,GOT2,HSPB1,ISOC1,KLF4,LDHB,MAD2L1,MCM2,MCM4,MCM5,MIF,NCAPG,NME1,NUDT1,PCNA,PRC1,PRDX4,PRIM1,PRKCH,PSMA6,RAD51,RAD51AP1,RFC4,RRM2,SHCBP1,SMS,SORD,SPARC,TKT,TMEM97,TTK,TUBA1C,TYMS,UNG
PUJANA_BRCA2_PCC_NETWORK	1.69144e-10	9.77174	423	706	48	21142	ALDH1A2,AURKA,AURKB,BAX,CDC25B,CDC45,CDC6,CDK1,CDT1,DDX39A,DTYMK,E2F1,ELOVL5,FDFT1,FEN1,FRAT2,HMGB2,LBR,LCK,LMNB1,MAD2L1,MAZ,MCM2,MCM4,MCM5,MCM7,MFHAS1,MSH2,MYBL2,NCAPH,PCNA,POLD1,PRIM1,PRPS1,RAD51AP1,RAD54L,RFC3,RFC4,RNASEH2A,RPIA,RRM2,SAC3D1,SNRPB,TCP1,TTK,TYMS,UNG,WDR77
ZHENG_GLIOBLASTOMA_PLASTICITY_UP	1.77995e-10	9.74959	250	706	36	21142	ACSL3,AURKA,AURKB,BIRC5,CDC45,CDT1,CEBPA,CENPN,DDX39A,DUSP4,E2F7,EXO1,FEN1,GCAT,LMNB1,MAD2L1,MCM2,MCM4,MCM5,MYO1B,PLK1,POLD1,PRC1,RAD51,RAD51AP1,RAD54L,RASSF3,RCC1,RFC4,RRM2,SHCBP1,SPRY1,TRIM2,UCHL5,UHRF1,ZNF367
LINDGREN_BLADDER_CANCER_CLUSTER_1_DN	1.82071e-10	9.73976	378	706	45	21142	AKAP12,APEX2,ATAD2,AURKA,BIRC5,BLVRB,CDC25B,CDC45,CDC6,CDCA2,CDCA4,CDCA7,CDK1,CDT1,CEBPA,CENPN,COL4A2,DEPDC1,E2F1,EBP,EMP2,EXO1,FAM83D,HMGB2,KIF21B,MCM5,MYBL2,MYL9,NR4A1,NUDT1,ORC1,PDXP,PIK3AP1,PLK1,POC1A,PRC1,RAD51,RAD54L,RFC3,RFC4,RNASEH2A,RRM2,TAGLN2,TMEM97,UCK2
BENPORATH_ES_1	2.00211e-10	9.69851	379	706	45	21142	AURKB,BCL2L12,BIRC5,BOP1,CDC6,CDCA5,CDK1,CDT1,CNTNAP2,DSG2,EXOSC5,FEN1,FKBP5,FRAT2,FZD5,GAL,GMNN,HNRNPAB,LCK,MCM10,MCM2,MCM4,MCM5,MCM7,MSH2,NCAPH,NOP16,NPM3,NUDT1,OIP5,ORC1,PAK1IP1,PRIM1,PRIM2,PRPS1,PUS1,RAB3B,RAD51AP1,RFC3,RFC4,RRM2,SMS,TTLL12,UNG,ZIC3
FLORIO_NEOCORTEX_BASAL_RADIAL_GLIA_DN	2.99586e-10	9.52348	190	706	31	21142	APOD,AURKA,AURKB,BIRC5,CDC45,CDCA2,CDCA5,CDK1,CENPM,DEPDC1,DEPDC1B,EXO1,FBXO5,HMGB2,HSD17B11,KIF20A,LMNB1,MAD2L1,MYBL2,NCAPH,PIMREG,PLK1,POC1A,PRC1,RAD51AP1,RRM2,SGO1,SHCBP1,SLC15A2,SPARC,TTK
FARMER_BREAST_CANCER_APOCRINE_VS_BASAL	5.51308e-10	9.25861	330	706	41	21142	ACSL3,AKR1D1,APOD,AZGP1,BLVRB,CADPS2,CDC42EP3,CNTNAP2,CRISP3,CROT,CYP4F8,CYP51A1,DHCR24,DHRS2,DUSP4,ELOVL5,FAM174B,FASN,FBL,FDFT1,GALE,GALNT7,GNMT,HERC5,HGD,INPP4B,KCNMA1,KIF20A,KLF5,LBR,LDHB,PKP1,PRLR,SPDEF,TMPRSS2,TP53TG1,TRIM36,TSPAN13,TTLL12,TYMS,ZWILCH
AFFAR_YY1_TARGETS_DN	6.56675e-10	9.18265	234	706	34	21142	ANKH,AURKA,AURKB,BIRC5,CDC6,CDT1,DHCR24,DUSP9,EXO1,FDFT1,FEN1,GNB4,HMGB2,KIF20A,MAD2L1,MCM4,MCM5,MCM7,MSH2,NCAPG,PLK1,PRC1,PRDX4,PRPS1,RAD51AP1,RFC4,RIPK4,SCARB1,SHCBP1,SLC25A5,TDRD1,TTK,UHRF1,UNG
PUJANA_BRCA1_PCC_NETWORK	9.48759e-10	9.02284	1652	706	111	21142	AKIRIN2,ARC,ARPC4,AURKA,AURKB,BAX,BOP1,BYSL,CDC45,CDC6,CDK1,CDT1,COASY,CYP51A1,DDX39A,DTYMK,E2F1,EIF3B,EIF4A3,ELOVL5,ERH,EXO1,FBL,FDFT1,FEN1,GGCT,GRK6,GSR,HK2,HMGB2,HNRNPAB,HSPE1,HTR3A,HTRA2,IFRD2,IGF1R,JTB,KIF21B,LBR,LDHB,LMNB1,LMNB2,LSM7,MAD2L1,MAGEA1,MATR3,MAZ,MCCC2,MCM2,MCM4,MCM5,MCM7,MGAT2,MIF,MRPL12,MSH2,MYBL2,NCAPH,NME1,NME2,NOP16,NOP2,NPM3,NUDT1,ODC1,OIP5,ORC1,ORC5,PABPC4,PCNA,PFKFB3,PKMY…
WINNEPENNINCKX_MELANOMA_METASTASIS_UP	1.0101e-09	8.99563	162	706	28	21142	ATAD2,AURKA,BIRC5,CDC45,CDC6,CDCA5,CDK1,CENPN,DTYMK,EXO1,GLRX2,GMNN,HTRA2,MCM4,NCAPG,NCAPH,NME1,PCNA,PLOD2,PRC1,PRIM2,RAD54L,RFC4,RRM2,SHCBP1,TYMS,UHRF1,ZNF367
CHANG_CORE_SERUM_RESPONSE_UP	1.10941e-09	8.95491	212	706	32	21142	ADAMTS1,CDCA4,CENPN,CENPW,CKLF,EMP2,IFRD2,LMNB2,LYAR,MCM7,MRPL12,MRPS28,MYBL2,NCLN,NME1,NOP16,NUDT1,NUP35,PLOD2,POLR3K,RAB3B,RFC3,SLC25A5,SMS,SNRPB,SRM,TOMM40,UAP1,UBE2J1,UQCR10,WDR77,ZWILCH
REACTOME_CELL_CYCLE_MITOTIC	1.45258e-09	8.83786	325	706	40	21142	AURKA,AURKB,BIRC5,CDC25B,CDC45,CDC6,CDK1,CDK6,CDT1,CENPM,CENPN,DHFRP1,E2F1,FBXO5,FEN1,GMNN,KIF20A,MAD2L1,MCM10,MCM2,MCM4,MCM5,MCM7,MYBL2,ORC1,ORC5,PCNA,PKMYT1,PLK1,POLD1,PRIM1,PRIM2,PSMA6,RANGAP1,RBBP4P1,RFC3,RFC4,RRM2,TYMS,ZWILCH
MORI_IMMATURE_B_LYMPHOCYTE_DN	1.80448e-09	8.74365	90	706	21	21142	CDC45,CDCA5,CDCA7,CDK1,HMGB2,HNRNPAB,LMNB1,MCM10,MCM2,MCM7,NCAPH,PCNA,PRC1,PRDX4,PRIM1,RAD51,RAD54L,RRM2,SLBP,TTK,UCK2
OXFORD_RALA_OR_RALB_TARGETS_UP	2.1049e-09	8.67677	48	706	16	21142	AURKB,BIRC5,BOP1,CDC6,CDK1,CENPM,FEN1,MCM2,MCM4,MCM5,MCM7,PPIF,RRM2,SAC3D1,TMEM97,TYMS
REACTOME_DNA_REPLICATION	2.31662e-09	8.63515	192	706	30	21142	AURKB,BIRC5,CDC45,CDC6,CDT1,CENPM,CENPN,E2F1,FBXO5,FEN1,GMNN,KIF20A,MAD2L1,MCM10,MCM2,MCM4,MCM5,MCM7,ORC1,ORC5,PCNA,PLK1,POLD1,PRIM1,PRIM2,PSMA6,RANGAP1,RFC3,RFC4,ZWILCH
GOLDRATH_ANTIGEN_RESPONSE	2.63076e-09	8.57992	346	706	41	21142	ASF1B,AURKA,AURKB,BIRC5,CDC45,CDC6,CDCA5,CDK1,DUSP1,EBP,ELL2,FEN1,GCAT,GMNN,GNG10,HMGB2,KIF20A,LMNB1,LRRC59,MAD2L1,MCM10,MCM4,MCM5,NCAPH,ODC1,PCNA,PERP,PLK1,POLR3K,PRC1,PRDX4,PRIM1,PRIM2,PTGER4,RAD51,RAD51AP1,RRM2,RUNX2,SLC2A3,TMEM97,TTK
REACTOME_E2F_MEDIATED_REGULATION_OF_DNA_REPLICATION	2.85945e-09	8.54372	35	706	14	21142	CDC45,CDC6,CDK1,CDT1,DHFRP1,E2F1,FBXO5,ORC1,ORC5,PCNA,PRIM1,PRIM2,RRM2,TYMS
REACTOME_G1_S_SPECIFIC_TRANSCRIPTION	3.94827e-09	8.40359	19	706	11	21142	CDC45,CDC6,CDK1,CDT1,DHFRP1,E2F1,FBXO5,ORC1,PCNA,RRM2,TYMS
PENG_GLUTAMINE_DEPRIVATION_DN	4.65922e-09	8.33169	337	706	40	21142	BYSL,DHCR24,DTYMK,EBP,EIF4A3,ERH,FASN,FBL,FDFT1,GJB1,HNRNPAB,HRAS,HSPE1,IFRD2,IMPDH1,LDHB,LMNB1,MAZ,MRPL12,MRPS12,NME1,NOP16,ODC1,PNP,PPIF,PRDX4,PRPS1,PSMA6,RANGAP1,RNF126,RRS1,SLC19A1,SRM,TCP1,TMED9,TMEM109,TOMM40,UCK2,WDR77,ZFP36L2
FEVR_CTNNB1_TARGETS_DN	7.35742e-09	8.13327	553	706	53	21142	ASF1B,AURKB,BIRC5,CDC6,CDCA4,CDK1,CDT1,CENPW,DTYMK,E2F1,ERH,EXO1,FBL,FBXO5,FEN1,GNPNAT1,HMGB2,HNRNPAB,IMPA2,KIF20A,LBR,MATR3,MCM2,MCM4,MCM5,MCM7,MSH2,NXT1,PCNA,POLD1,PRC1,PRDX4,PRIM1,PRIM2,PSMA6,RAD51,RAD51AP1,RAD54L,RFC3,RFC4,RRM2,RRS1,SCARB1,SHCBP1,SLBP,SLC19A1,SLC25A5,TCP1,TTK,TUBA3D,TYMS,UCHL5,UNG
KRIEG_HYPOXIA_NOT_VIA_KDM3A	8.28172e-09	8.08188	770	706	65	21142	AGPAT5,AKAP12,ANG,ASF1B,ATAD2,BIRC5,CARD10,CDCA5,CDT1,DAPK3,DEGS1,DUSP1,E2F7,ELL2,FSCN1,HK2,IMP3,IMPDH1,IRS2,KCNMA1,KLF6,LOX,MAFK,MCM5,MEX3D,MGLL,MTFP1,MYBL2,NDRG1,OIP5,ORC1,OSBPL10,PAQR4,PDXP,PERP,PFKFB3,PKMYT1,PLOD2,PMEPA1,PRC1,PRR7,RAB20,RAB3B,RABGEF1,RAD51,RASSF7,RAVER1,RIPK4,RNF126,SAP30,SEC61G,SLC39A1,SLCO4A1,SMS,SOAT1,SPRY1,STK39,TNFAIP8,TPI1P1,TYMS,UAP1,UBE2J1,UHRF1,ZNF367,ZP1
SONG_TARGETS_OF_IE86_CMV_PROTEIN	8.35557e-09	8.07802	60	706	17	21142	CDK1,CDT1,E2F1,FEN1,HMGB2,MAD2L1,MCM2,MCM5,MCM7,MSH2,MYBL2,PCNA,PNP,RFC3,RFC4,TYMS,UNG
REN_BOUND_BY_E2F	1.1228e-08	7.9497	61	706	17	21142	CDC6,CDK1,FEN1,MAD2L1,MCM5,MSH2,ORC1,PCNA,POLD1,PRIM2,RAD51,RAD54L,RFC3,RFC4,SUPT4H1,TTK,UNG
MEISSNER_BRAIN_HCP_WITH_H3K4ME3_AND_H3K27ME3	1.30589e-08	7.88409	1069	706	80	21142	ABT1,ALDH1A2,ARHGAP28,CACNG4,CARD10,CDCA7,CDK1,CDKN1C,CMTM7,CMTM8,CRISPLD2,DEPDC1B,DLX1,DLX2,DOCK8,DSG2,DUSP4,E2F7,EMP2,F2RL1,FGFR3,FHDC1,FZD5,GCNT1,GLIPR2,GNA14,HES1,HK2,HRH3,KCNQ2,KLF4,KREMEN2,LAD1,LAMA1,LOX,MAF,MAFB,MYBL2,NCAPH,NDRG1,NKX3-1,NME2,NRARP,PDE9A,PERP,PHLDA2,PHLDB2,PIK3AP1,PLEKHF1,PLOD2,PRKCH,PRSS12,PTGER4,RAB20,RAB3B,RASSF7,RIPK4,RPRML,RRM2,SLC2A4,SLC43A1,SMAD6,STK17B,STOM,TAGLN2,T…
RODRIGUES_THYROID_CARCINOMA_POORLY_DIFFERENTIATED_UP	1.41147e-08	7.85033	633	706	57	21142	AGPAT5,AP2S1,ATAD2,AURKA,CDC6,CDCA7,CDK1,CENPN,CENPW,CKLF,CYP51A1,DDX39A,DTYMK,FBXO5,FEN1,GALE,GGCT,GLRX2,GNAI1,GSR,HMGB2,IMPDH1,LMNB1,LMNB2,LRR1,LYAR,MAD2L1,MATR3,MCM2,MCM4,MCM7,MRPS12,MTFP1,NCAPG,NME1,NOP16,NPM3,ORC5,PCNA,PHLDA2,PNP,PRC1,RAD51AP1,RCC1,RFC4,RNASEH2A,SHCBP1,SLC25A32,SOAT1,TMEM97,TNFSF9,TTK,TYMS,UCHL5,UCK2,ZNF367,ZWILCH
FISCHER_G1_S_CELL_CYCLE	1.67308e-08	7.77648	194	706	29	21142	ADAMTS1,ATAD2,CDC6,CDCA7,CDT1,E2F1,E2F7,EAF2,EXO1,FEN1,GMNN,IGF1R,KLF5,MCM10,MCM2,MCM5,MSH2,PAQR4,PCNA,PRIM1,RAD51,RFC4,RRM2,SLBP,TIFA,TXNRD1,UNG,ZMYND19,ZNF367
MISSIAGLIA_REGULATED_BY_METHYLATION_DN	1.77164e-08	7.75163	122	706	23	21142	AURKA,CDC45,CDC6,CDK1,CDT1,CENPM,DTYMK,EBP,FASN,FBL,GMNN,HMGB2,HNRNPAB,LBR,LMNB1,MCM5,NCAPH,PRC1,PRIM1,RCC1,RFC4,RNASEH2A,TYMS
REACTOME_MITOTIC_G1_G1_S_PHASES	3.25789e-08	7.48706	137	706	24	21142	CDC45,CDC6,CDK1,CDK6,CDT1,DHFRP1,E2F1,FBXO5,MCM10,MCM2,MCM4,MCM5,MCM7,MYBL2,ORC1,ORC5,PCNA,PKMYT1,PRIM1,PRIM2,PSMA6,RBBP4P1,RRM2,TYMS
MARKEY_RB1_CHRONIC_LOF_UP	3.63867e-08	7.43906	115	706	22	21142	ANGPT2,CDCA4,CDCA7,CDT1,CYP51A1,FDFT1,GAS2,GSR,KIF20A,KLF4,MCM2,MCM7,MSH2,NCAPH,PCNA,POLD1,PRDX4,PRIM1,RAB3B,RFC3,SLBP,UHRF1
NAKAMURA_TUMOR_ZONE_PERIPHERAL_VS_CENTRAL_UP	4.06117e-08	7.39135	285	706	35	21142	ADAMTS1,AKAP12,BIRC5,BOP1,CDK1,CENPM,CENPW,CMTM7,DCTPP1,DTYMK,F2RL1,GLRX2,GPATCH4,HNRNPAB,HSPE1,INF2,KLF7,MCM5,NCAPG,NME1,NOP2,PMEPA1,PNP,PSMA6,PUS1,RFC4,RRM2,SHCBP1,SLC15A2,SLC35F2,SRXN1,STUB1,THBS1,TNS4,TUBA1C
MARTENS_TRETINOIN_RESPONSE_DN	5.00716e-08	7.30041	841	706	67	21142	ABT1,AURKA,BAX,BIRC5,CDCA7,CDK1,CDT1,CENPM,COASY,COMTD1,CORO1B,CYB561D2,E2F1,EEF1A1P9,ELL3,ENDOG,FADD,FBXO5,FBXW9,FRAT2,GGCT,GPATCH4,HES1,HSPB1,HSPE1,JAGN1,LDHB,LENG9,MAD2L1,MATR3,MAZ,MGAT2,MRPL12,MRPS18C,NME1-NME2,NME3,NOP16,NPM3,NXT1,PAQR4,PCNA,PKMYT1,PLK1,PNMA1,PRSS12,PSENEN,PUS1,PUSL1,RFC4,RPL13AP20,RPL17,RRM2,RRS1,SCO2,SLC43A1,SRM,SUPT4H1,TBRG4,TCP1,TIMM10,TIMM13,TUBA1C,TYMS,UCHL5,YDJC,ZFP36…
WELCSH_BRCA1_TARGETS_DN	6.11379e-08	7.21369	141	706	24	21142	BOP1,BYSL,CDC25B,DHCR24,DUSP1,EIF3B,FASN,FDFT1,FGFR3,GAL,HRAS,LMNB2,MCM2,MRPS12,NDRG1,NME3,PABPC4,POLD1,RASSF7,RCC1,RPIA,SLC19A1,SMAD6,SRM
LEE_EARLY_T_LYMPHOCYTE_UP	6.17219e-08	7.20956	107	706	21	21142	ATAD2,AURKA,BIRC5,CDCA2,CDK1,CENPW,E2F7,GALNT7,KIF20A,LRR1,MCM10,MCM2,MCM4,NCAPG,OIP5,PRC1,RAD51AP1,RRM2,TTK,TYMS,UHRF1
KEGG_DNA_REPLICATION	8.18545e-08	7.08696	36	706	13	21142	FEN1,MCM2,MCM4,MCM5,MCM7,PCNA,POLD1,POLE4,PRIM1,PRIM2,RFC3,RFC4,RNASEH2A
DACOSTA_UV_RESPONSE_VIA_ERCC3_UP	9.65243e-08	7.01536	309	706	36	21142	AP2S1,ARPC4,BTG1,CDC6,CDKN1C,CDT1,CEBPD,E2F1,FBXL14,FEN1,FGFR3,FRAT2,GCAT,MAZ,MCM4,MCM5,MRPS12,MYBL2,NCLN,NME3,NOP2,NR4A1,PAQR4,PCNA,PHLDA2,PKMYT1,PNP,PPIF,RGS2,SAC3D1,SCO2,THBS1,TMED1,TMEM109,TNFSF9,TYMS
REACTOME_CELL_CYCLE	1.04253e-07	6.98191	421	706	43	21142	AURKA,AURKB,BIRC5,CDC25B,CDC45,CDC6,CDK1,CDK6,CDT1,CENPM,CENPN,DHFRP1,E2F1,FBXO5,FEN1,GMNN,KIF20A,LMNB1,MAD2L1,MCM10,MCM2,MCM4,MCM5,MCM7,MYBL2,OIP5,ORC1,ORC5,PCNA,PKMYT1,PLK1,POLD1,PRIM1,PRIM2,PSMA6,RANGAP1,RBBP4P1,RFC3,RFC4,RRM2,TERT,TYMS,ZWILCH
WHITFIELD_CELL_CYCLE_LITERATURE	1.07226e-07	6.9697	44	706	14	21142	AURKA,BIRC5,CDC45,CDC6,CDK1,E2F1,KIF20A,MCM2,MSH2,PCNA,PLK1,RRM2,SLBP,TYMS
REACTOME_DNA_STRAND_ELONGATION	1.09135e-07	6.96204	30	706	12	21142	CDC45,FEN1,MCM2,MCM4,MCM5,MCM7,PCNA,POLD1,PRIM1,PRIM2,RFC3,RFC4
VERNELL_RETINOBLASTOMA_PATHWAY_UP	1.24437e-07	6.90505	70	706	17	21142	ASF1B,ATAD2,CDCA4,CDCA5,FBXO5,FEN1,HMGB2,MCM4,MCM7,PCNA,RAD51AP1,RFC3,RFC4,RRM2,SLBP,TMEM97,ZNF367
REACTOME_G1_S_TRANSITION	1.52209e-07	6.81756	112	706	21	21142	CDC45,CDC6,CDK1,CDT1,DHFRP1,E2F1,FBXO5,MCM10,MCM2,MCM4,MCM5,MCM7,ORC1,ORC5,PCNA,PKMYT1,PRIM1,PRIM2,PSMA6,RRM2,TYMS
REACTOME_ACTIVATION_OF_THE_PRE_REPLICATIVE_COMPLEX	1.72678e-07	6.76276	31	706	12	21142	CDC45,CDC6,CDT1,MCM10,MCM2,MCM4,MCM5,MCM7,ORC1,ORC5,PRIM1,PRIM2
LEI_MYB_TARGETS	2.17503e-07	6.66253	318	706	36	21142	ACTA2,AGR2,AURKA,AURKB,BICD2,BTG1,CDC25B,CLDN7,CRYAB,DHRS2,EBP,EIF3B,ELOVL5,EMP2,FEN1,HSPB1,HSPE1,KRT14,KRT19,LDHB,MCM2,MCM7,MRPS12,MYL9,NME1,NNMT,PCNA,PNP,RGS2,S100P,SLC2A3,SPARC,TGM2,TM4SF1,TXNRD1,ZFP36L2
LEE_LIVER_CANCER_SURVIVAL_DN	2.20299e-07	6.65699	175	706	26	21142	ATAD2,BZW2,DCTPP1,DEPDC1,DSG2,EIF4A3,FBL,HMGB2,IGF1R,KLF5,KRT19,LYAR,MCM2,MCM7,ODC1,PCNA,PHLDA2,PNP,RAB32,RBX1,RGS2,RMI2,RPL17,SLBP,TTK,ZWILCH
YEGNASUBRAMANIAN_PROSTATE_CANCER	3.21874e-07	6.49231	128	706	22	21142	AGR2,ATAD2,AZGP1,CENPN,CRISP3,DHRS2,GAS2,GCNT1,GPR37,HPGD,KLK2,KLK3,MAGEA1,MCCC2,NKX3-1,SLC43A1,SORD,SPDEF,TARP,TMPRSS2,TRIM36,ZBTB10
PUJANA_BREAST_CANCER_WITH_BRCA1_MUTATED_UP	3.5179e-07	6.45372	56	706	15	21142	AURKA,AURKB,CDK1,DDX39A,LBR,MCM2,MCM4,MCM5,MSH2,MYBL2,RAD51AP1,RAD54L,RFC3,RFC4,RPIA
PUJANA_BRCA_CENTERED_NETWORK	3.56682e-07	6.44772	117	706	21	21142	AURKA,CDK1,DDX39A,HMGB2,LBR,LMNB1,MAD2L1,MCM2,MCM4,MCM5,MSH2,MYBL2,PCNA,PRPS1,RAD51AP1,RAD54L,RFC3,RFC4,RPIA,SNRPB,UNG
BURTON_ADIPOGENESIS_PEAK_AT_16HR	3.76792e-07	6.4239	40	706	13	21142	ASF1B,CDC6,CDCA7,FEN1,HMGB2,IFRD2,MCM4,MCM5,MCM7,POLD1,PRPS1,RAD51,RRM2
MORI_LARGE_PRE_BII_LYMPHOCYTE_UP	4.90346e-07	6.3095	86	706	18	21142	ASF1B,AURKA,CDCA5,CDCA7,CDK1,HNRNPAB,LMNB1,MCM2,MCM5,MCM7,MYBL2,NCAPH,PRC1,PRDX4,RANGAP1,RRM2,SLBP,TTK
KONG_E2F3_TARGETS	5.32607e-07	6.27359	97	706	19	21142	ASF1B,AURKA,CDC6,CDCA5,DEPDC1,FEN1,HMGB2,KIF20A,LMNB1,NCAPG,NCAPH,PLK1,PRC1,PRIM1,RAD51,RAD51AP1,RAD54L,SHCBP1,TYMS
ELVIDGE_HYPOXIA_DN	7.62047e-07	6.11802	146	706	23	21142	ALDH4A1,ARPC4,BOP1,CCDC86,CEBPA,CENPN,CORO1B,GLUD2,LRRC59,MAZ,MRPS12,NCLN,NR2F6,ODC1,POLR3K,PPIF,PUS1,RANGAP1,SDF2L1,SPDEF,SRM,WDR77,ZWILCH
REACTOME_MITOTIC_M_M_G1_PHASES	7.93157e-07	6.10064	172	706	25	21142	AURKB,BIRC5,CDC45,CDC6,CDT1,CENPM,CENPN,E2F1,FBXO5,GMNN,KIF20A,MAD2L1,MCM10,MCM2,MCM4,MCM5,MCM7,ORC1,ORC5,PLK1,PRIM1,PRIM2,PSMA6,RANGAP1,ZWILCH
ACEVEDO_FGFR1_TARGETS_IN_PROSTATE_CANCER_MODEL_UP	1.00897e-06	5.99612	289	706	33	21142	ARC,ARPC1B,BIRC5,BZW2,C1ORF116,CAPN13,CCM2,CDCA5,CDK6,CYP51A1,DUSP4,EMP2,F2RL1,F5,GALNT7,GMDS,HK2,HOMER2,KCNMA1,KLF5,KLF6,LRG1,MCM4,NOSTRIN,PPARGC1A,RAB32,SPRY1,THBS1,THRB,TIFA,TSPO,TTR,VILL
KAUFFMANN_MELANOMA_RELAPSE_UP	1.30742e-06	5.88358	61	706	15	21142	CDC45,CDC6,EXO1,GMNN,MAD2L1,MCM4,MCM7,MSH2,PCNA,POLE4,RAD51,RAD51AP1,RAD54L,RFC4,RRM2
FOURNIER_ACINAR_DEVELOPMENT_LATE_2	1.36057e-06	5.86628	277	706	32	21142	AURKA,BIRC5,CDC45,CDC6,CDK1,CENPN,COL4A2,CYP51A1,DEPDC1,DUSP4,FEN1,GALE,IMPDH1,MCM2,MCM4,MCM7,ODC1,PLK1,PRC1,PRPS1,RCC1,RFC3,RNASEH2A,RRM2,SMS,SNRPB,STK39,TTK,TTLL12,UAP1,UCHL5,UCK2
ZHAN_MULTIPLE_MYELOMA_PR_UP	1.9596e-06	5.70783	45	706	13	21142	AURKA,BIRC5,CDK1,DEPDC1B,MAGEA1,MCM10,PRC1,RFC4,RRM2,SLC19A1,TTK,TYMS,ZWILCH
GRADE_COLON_AND_RECTAL_CANCER_UP	2.77674e-06	5.55646	285	706	32	21142	AURKA,AZGP1,CDC25B,CDC45,CDC6,CDCA7,CDK1,DDX39A,EIF3B,FBL,FDFT1,HMGB2,HSPE1,LDHB,LYAR,MCM2,MCM4,MCM5,MCM7,PCNA,PDCD2L,PERP,PFDN2,PLK1,PRDX4,RCC1,RMI2,RRM2,SNRPB,SPARC,TKT,TMEM97
WU_APOPTOSIS_BY_CDKN1A_VIA_TP53	2.88972e-06	5.53914	55	706	14	21142	ATAD2,AURKA,AURKB,CDC25B,CDK1,EXO1,HMGB2,MCM2,MCM4,MCM7,NCAPG,PRC1,TTK,TYMS
DOANE_RESPONSE_TO_ANDROGEN_UP	3.32818e-06	5.47779	184	706	25	21142	ALDH4A1,AZGP1,C1ORF116,CACNG4,CNTNAP2,CROT,CYP4F8,EAF2,ENDOD1,ENDOG,FAM174B,FASN,FKBP5,GMDS,IQGAP2,MAFB,MCCC2,MYBPC1,NDRG1,POP1,S100P,SLC15A2,SORD,TMPRSS2,TSKU
WHITFIELD_CELL_CYCLE_G1_S	4.8363e-06	5.31549	147	706	22	21142	ADAMTS1,APEX2,ATAD2,CDC6,CDCA7,E2F1,GMNN,HRAS,MCM2,MCM4,MCM5,MED31,MSH2,ORC1,PCNA,PDXP,RMI2,SLBP,UHRF1,UNG,ZMYND19,ZNF367
CHICAS_RB1_TARGETS_CONFLUENT	4.8441e-06	5.31479	567	706	48	21142	ACTA2,ACTG2,AFF3,ALDH1A3,ALPK2,BLVRB,CARD10,CDC42EP3,CDCA7,CROT,DHCR24,ELOVL2,F2RL1,FBN1,GBP1,GBP2,GMDS,GPC6,HPGD,HSPB1,KCNMA1,KCNN2,KLF7,LBH,LOX,MCM4,MCM5,MYL9,NNMT,PRIM1,PRIM2,PRPS1,PRSS12,RAB3B,RAD51AP1,SPARC,TGFBR2,TGM2,THBS1,TMEM97,TMTC2,TNS3,TP53TG1,TSPO,TUBA1C,TYMS,UHRF1,ZFP36L2
WANG_CISPLATIN_RESPONSE_AND_XPC_UP	5.1638e-06	5.28703	202	706	26	21142	AURKA,BIRC5,CDK1,FEN1,FXYD3,GALE,GGCT,GREB1,HES1,HMGB2,KRT14,LBR,MAD2L1,POLD1,RAD51,RFC4,RGS2,RNASEH2A,SCARB1,SLC19A1,SLC2A3,THBS1,TM4SF1,TNFSF9,TOMM40,TTK
MOLENAAR_TARGETS_OF_CCND1_AND_CDK4_DN	6.13639e-06	5.21209	58	706	14	21142	AURKA,CDC45,CDC6,CDCA2,CDCA7,CENPN,E2F7,ENDOD1,FAM83D,GPC6,KIF20A,MCM7,NCAPH,ZNF367
FRASOR_RESPONSE_TO_SERM_OR_FULVESTRANT_DN	8.1658e-06	5.088	50	706	13	21142	AURKA,CDC25B,CDK1,E2F1,GAL,MAZ,MCM2,MCM5,MCM7,NUDT1,PRIM1,RNASEH2A,RNF126
MORI_PRE_BI_LYMPHOCYTE_UP	9.29965e-06	5.03153	80	706	16	21142	AURKA,CDCA5,CDCA7,CDK1,HNRNPAB,HSPBP1,LMNB1,MCM2,MCM7,MIF,NCAPH,PRC1,PRDX4,RAD51,RRM2,TTK
ENK_UV_RESPONSE_EPIDERMIS_DN	1.11032e-05	4.95455	508	706	44	21142	ABCC4,ADAMTS1,ANG,AZGP1,CDKN1C,DAPK3,DHCR24,DNAJC1,DUSP2,ELL2,EMP2,F2RL1,FSCN1,GBP2,GNAI1,HK2,HPGD,HSPB1,IL6R,IMPA2,IRS2,NDRG1,NXT1,ODC1,PDE4B,PFKFB3,PNP,PRC1,PRKCH,PTGER4,PTPN21,RIPK4,RPS6KA3,SCARB1,SH2D3A,SLCO4A1,SNAI2,SPON2,STK17B,TXNRD1,UAP1,UCK2,UNG,ZFP36L2
REACTOME_SYNTHESIS_OF_DNA	1.12183e-05	4.95007	92	706	17	21142	CDC45,CDC6,CDT1,FEN1,MCM2,MCM4,MCM5,MCM7,ORC1,ORC5,PCNA,POLD1,PRIM1,PRIM2,PSMA6,RFC3,RFC4
DOANE_BREAST_CANCER_CLASSES_UP	1.52287e-05	4.81734	72	706	15	21142	AGR2,ALDH4A1,APOD,AZGP1,CRISP3,CYP4F8,DHRS2,FAM174B,FASN,GALNT7,HGD,KCNMA1,PRLR,SPDEF,TARP
ALCALAY_AML_BY_NPM1_LOCALIZATION_DN	1.56491e-05	4.80551	184	706	24	21142	ALDH4A1,BIRC5,BLVRB,CDC6,CENPM,CSGALNACT1,DTYMK,ENDOD1,EXO1,HLA-DMA,HOMER2,INPP4B,MAD2L1,MCM10,MCM2,MCM4,NCAPH,POLD1,RRM2,SHCBP1,SPARC,STOM,TSPAN13,TYMS
CHEMNITZ_RESPONSE_TO_PROSTAGLANDIN_E2_UP	2.24128e-05	4.6495	146	706	21	21142	AP2S1,ASF1B,ATAD2,AURKA,BIRC5,CDC45,CDC6,KIF20A,LMNB1,MCM4,MZT2B,NCAPG,NCAPH,NOP16,PRC1,RNASEH2A,RPIA,RRM2,TTK,UAP1,UHRF1
LE_EGR2_TARGETS_UP	2.25265e-05	4.64731	108	706	18	21142	AURKA,BIRC5,BZW2,CDK1,CDKN1C,HMGB2,KIF20A,LMNB1,MAD2L1,MCM4,MCM5,MCM7,NCAPH,PLK1,PRC1,RAD51,RRM2,UHRF1
SUNG_METASTASIS_STROMA_DN	2.25472e-05	4.64691	54	706	13	21142	BYSL,CDC45,CDCA5,DHRS7,DTYMK,E2F1,GMNN,LYAR,MCM5,PCNA,PKMYT1,PNP,ZNF367
REACTOME_G2_M_CHECKPOINTS	2.29079e-05	4.64001	45	706	12	21142	CDC45,CDC6,CDK1,MCM10,MCM2,MCM4,MCM5,MCM7,ORC1,ORC5,RFC3,RFC4
BOYAULT_LIVER_CANCER_SUBCLASS_G3_UP	2.39471e-05	4.62075	188	706	24	21142	ARPC4,BOP1,CCDC86,CDC6,CENPM,CKLF,EIF3B,EIF4A3,LRRC59,MAD2L1,NCAPG,NDRG1,NME1,PAK1IP1,PHLDA2,PLOD2,PRIM1,RAD51AP1,RFC3,SEC61G,SRM,TTK,UCK2,ZWILCH
KAUFFMANN_DNA_REPLICATION_GENES	2.53422e-05	4.59616	147	706	21	21142	CDC45,CDC6,CRYAB,FEN1,GMNN,IGF1,MCM2,MCM4,MCM5,MCM7,MSH2,ORC1,ORC5,PCNA,POLD1,POLE4,PRIM2,RFC3,RFC4,RRM2,TERT
REACTOME_S_PHASE	2.6154e-05	4.58246	109	706	18	21142	CDC25B,CDC45,CDC6,CDT1,FEN1,MCM2,MCM4,MCM5,MCM7,ORC1,ORC5,PCNA,POLD1,PRIM1,PRIM2,PSMA6,RFC3,RFC4
WAMUNYOKOLI_OVARIAN_CANCER_LMP_UP	2.79698e-05	4.55331	265	706	29	21142	AGR2,BZW2,C1ORF116,DOHH,EBP,FAM174B,FDFT1,FXYD3,GALE,GALNT7,GMDS,HPGD,IMPA2,INF2,IQGAP2,JTB,KLF5,LSM7,MGLL,MPST,MRPL14,MRPL41,MRPS18A,PLEKHJ1,RNF126,SGSM3,TOMM40,TTLL12,UQCR11
REACTOME_ACTIVATION_OF_ATR_IN_RESPONSE_TO_REPLICATION_STRESS	3.52013e-05	4.45344	38	706	11	21142	CDC45,CDC6,MCM10,MCM2,MCM4,MCM5,MCM7,ORC1,ORC5,RFC3,RFC4
PUJANA_XPRSS_INT_NETWORK	5.86742e-05	4.23155	168	706	22	21142	AURKA,AURKB,CDK1,DDX39A,HMGB2,LBR,LMNB1,MAD2L1,MCM2,MCM4,MCM5,MSH2,MYBL2,PCNA,PRPS1,RAD51AP1,RAD54L,RFC3,RFC4,RPIA,SNRPB,UNG
BIOCARTA_MCM_PATHWAY	6.04394e-05	4.21868	18	706	8	21142	CDC6,CDT1,MCM2,MCM4,MCM5,MCM7,ORC1,ORC5
CUI_TCF21_TARGETS_2_UP	6.0927e-05	4.21519	428	706	38	21142	ALDH16A1,BZW2,CADPS2,CDC45,CDCA5,CDCA7,CDK1,CDT1,DCTPP1,DTYMK,EXOSC5,GPC6,GREB1,HLA-DMA,HOMER2,HSPBP1,IGF1,IGSF5,KLF5,LMNB1,MCM5,MCM7,MIF,NCAPH,NME1,POLD1,PRIM1,RAD51,RFC3,RHOU,SNRPB,SOAT1,SRM,TGM2,TIMM13,TMEM238,TMEM97,TRPM4
KEGG_CELL_CYCLE	6.3571e-05	4.19674	128	706	19	21142	CDC25B,CDC45,CDC6,CDK1,CDK6,CDKN1C,E2F1,MAD2L1,MCM2,MCM4,MCM5,MCM7,ORC1,ORC5,PCNA,PKMYT1,PLK1,RBX1,TTK
GAVIN_FOXP3_TARGETS_CLUSTER_P6	6.38549e-05	4.19481	91	706	16	21142	AURKA,AURKB,BIRC5,CDCA5,CDK1,KIF20A,MCM10,NCAPG,ODC1,PLK1,RAD51,RAD54L,RPL17,RRM2,TGFBR2,TYMS
ZAMORA_NOS2_TARGETS_UP	6.65983e-05	4.17654	69	706	14	21142	FEN1,HMGB2,KRT19,MCM2,MCM4,MCM5,MIF,PABPC4,PCNA,PNP,SMS,SRM,SUPT4H1,TYMS
HOLLERN_MICROACINAR_BREAST_TUMOR_UP	6.7065e-05	4.1735	32	706	10	21142	BCKDHA,BHLHA15,DHRS7,GJB1,HOMER2,IQGAP2,NR4A1,PPARGC1A,RASSF3,TSPAN13
BENPORATH_MYC_TARGETS_WITH_EBOX	7.74274e-05	4.11111	230	706	26	21142	BAX,BCL2L12,CEBPA,E2F1,EBP,FASN,HES1,IFRD2,IMPA2,LBR,LMNB2,MCM4,MCM7,NME1,NOP2,PER1,PLK1,RARB,RCC1,RGS2,SLBP,SLC19A1,SLC2A4,SRM,TERT,ZFP36L2
BASSO_B_LYMPHOCYTE_NETWORK	7.88557e-05	4.10317	143	706	20	21142	BYSL,CDK1,FEN1,GABARAP,HNRNPAB,HSPE1,MAD2L1,MRPL12,MRPS12,NDRG1,NME1,NOP16,ORC5,PCNA,PRDX4,RCC1,RFC4,TCP1,TOMM40,UCK2
SHEPARD_BMYB_MORPHOLINO_DN	7.98444e-05	4.09776	200	706	24	21142	AURKB,BIRC5,BLVRB,CDC6,CDCA2,CDK1,CEBPA,CEBPD,CENPM,DLX1,DLX2,EPDR1,FBXO5,GMNN,MCM2,MCM4,MCM5,MSH2,PRC1,PRIM1,RGS2,SRSF9,TTK,UHRF1
REACTOME_M_G1_TRANSITION	8.12325e-05	4.09027	81	706	15	21142	CDC45,CDC6,CDT1,E2F1,GMNN,MCM10,MCM2,MCM4,MCM5,MCM7,ORC1,ORC5,PRIM1,PRIM2,PSMA6
KAMMINGA_EZH2_TARGETS	8.43561e-05	4.07388	41	706	11	21142	AURKA,AURKB,CDCA5,CDCA7,GMNN,MAD2L1,MCM2,MCM4,PCNA,PRC1,PRIM1
PETROVA_ENDOTHELIUM_LYMPHATIC_VS_BLOOD_UP	9.29964e-05	4.03153	131	706	19	21142	ACSL3,ANGPT2,APOD,AURKB,CDK1,CDKN1C,DHCR24,EMP2,HMGB2,IQGAP2,LBR,LMNB1,MAF,MYBL2,NDRG1,PLK1,PNP,SPRY1,TTK
BHAT_ESR1_TARGETS_VIA_AKT1_UP	0.000101644	3.99292	281	706	29	21142	CDC6,CYP4F11,DHRS2,DUSP2,EIF3B,FOS,GPATCH4,GREB1,HK2,LRG1,MCM7,MSMB,MTFP1,NXT1,PCYT2,POP1,PPIF,SCARB1,SH2B2,SRM,TGM2,TOMM40,TRIM47,TRMT61A,TSKU,UHRF1,UNC5A,VGF,VWF
CHARAFE_BREAST_CANCER_LUMINAL_VS_BASAL_DN	0.000103629	3.98452	455	706	39	21142	ALDH1A3,ANKH,BICD2,CDC42EP3,CDK6,CEBPD,COL4A2,CRYAB,DSG2,ELL2,F2RL1,FAM83D,FDFT1,FSCN1,GBP1,GNAI1,HSD17B11,IRS2,KLF5,KRT14,LBH,LOX,MYO1B,NNMT,PERP,PHLDB2,PNLIPRP3,PRSS12,RGS2,RIPK4,SGK1,SNAI2,SOAT1,TAX1BP3,TBPL1,TGFBR2,TKT,TNFAIP8,WWTR1
DANG_BOUND_BY_MYC	0.000110064	3.95836	1103	706	71	21142	ABCC4,ABT1,AHSG,ARPC4,BAX,BCL2L12,CDC25B,CDC6,CDK6,CEBPA,COL4A2,CYB561D2,DEGS1,E2F1,ENDOG,EXO1,FASN,FBXO5,FZD5,GABARAP,GAL,GMDS,HES1,HSPE1,IFRD2,IL17C,IMPA2,KIF20A,LBR,MAD2L1,MCCC2,MCM5,MCM7,MGAT2,MSH2,MYBL2,NCAPG,NDRG1,NME1,NME2,NOP2,NXT1,ODC1,PCNA,PER1,PEX16,PKP1,POLR3K,RABGEF1,RAD51,RAD51AP1,RAD54L,RARB,RCC1,RGS2,SAP30,SCAND1,SDF2L1,SLBP,SLC19A1,SLC43A1,SNRPB,SRM,STUB1,TAGLN2,TERT,TIMM10,TYMS,…
NAGASHIMA_NRG1_SIGNALING_UP	0.000136058	3.86628	176	706	22	21142	ARC,CDC42EP3,DLX2,DUSP1,DUSP2,DUSP4,F2RL1,FOS,GAL,HES1,IL6R,IRS2,KLF6,NR4A1,PER1,PFKFB3,PHLDA2,RGS2,SGK1,SLCO4A1,SNAI2,YRDC
WANG_SMARCE1_TARGETS_DN	0.000146241	3.83493	371	706	34	21142	ADAMTS1,AFF3,AURKA,CKLF,DUSP4,DUSP9,EBP,GAL,GALNT7,GLRX2,HK2,HPSE,INPP4B,LBR,MAD2L1,MAGEA1,NCAPG,NOP16,PPIF,PRR7,PTGER4,SAC3D1,SGK1,SLBP,SLCO4A1,SMS,SPON2,SRM,TBRG4,TGM2,TM4SF1,TM4SF18,TSPAN13,UCHL5
FISCHER_G2_M_CELL_CYCLE	0.000193816	3.71261	225	706	25	21142	AURKA,AURKB,BIRC5,BTG1,CDC25B,CDCA2,CDK1,DEPDC1,DEPDC1B,DUSP4,FAM83D,HMGB2,KIF20A,LBR,MAD2L1,MGAT2,NCAPH,NUP35,OIP5,PLK1,PRC1,SAP30,SHCBP1,STK17B,TTK
SMID_BREAST_CANCER_BASAL_DN	0.000217228	3.66308	701	706	51	21142	ACSL3,AGR2,ALDH4A1,APOD,AZGP1,BLVRB,CACNA1H,CACNG4,CNTNAP2,CRISP3,CROT,CYP4F8,DHCR24,DHRS2,DNAJC1,DUSP4,ELOVL2,ELOVL5,FAM110B,FAM174B,FASN,FGFR3,GALNT7,GNA14,GNMT,GREB1,HGD,HPGD,HSPB1,IGF1,IGF1R,INPP4B,IQGAP2,KCNMA1,KRT19,MCCC2,MSMB,NME3,PLA1A,PRLR,SMPD3,SORD,SPDEF,STK39,TARP,TBC1D30,TP53TG1,TRIM36,TSKU,TSPAN13,TUBA3D
SCHAEFFER_PROSTATE_DEVELOPMENT_48HR_UP	0.000220529	3.65653	487	706	40	21142	ABCC4,ADH1C,AGR2,ALDH1A2,ALDH1A3,ARC,BHLHA15,C1ORF116,CEBPD,CRISPLD2,CROT,EAF2,ELOVL2,EMP2,ENDOD1,FGFR3,FKBP5,FXYD3,HPGD,IGSF5,JTB,KCND2,KLF15,KRT19,LRRC26,MAF,MAFB,NKX3-1,PKP3,PLA1A,PPFIBP2,RASD1,RGS2,SDHAF2,SGK1,SLC25A33,TBPL1,TMPRSS2,TRIM2,TSPAN13
ODONNELL_TFRC_TARGETS_DN	0.000242747	3.61485	139	706	19	21142	AURKA,AURKB,BIRC5,CDC6,CDK1,DEPDC1,DEPDC1B,FAM83D,FBXO5,FKBP5,KIF20A,MYBL2,NCAPH,PLK1,PRC1,RRM2,SHCBP1,TTK,ZNF628
GAL_LEUKEMIC_STEM_CELL_DN	0.000252942	3.59698	244	706	26	21142	ALDH4A1,ASF1B,BIRC5,CDC42EP3,CDC45,CDC6,CDK1,CEBPD,CENPM,E2F1,ELL2,FEN1,HPSE,KIF20A,LMNB1,MAFB,NCAPG,NR4A1,ORC1,PLK1,RAD51,RRM2,S100P,SAC3D1,SHCBP1,TYMS
DOUGLAS_BMI1_TARGETS_UP	0.000254227	3.59478	566	706	44	21142	ADAMTS1,AGPAT5,ALDH1A3,ANKH,CD320,CMTM7,CNTNAP2,COL4A2,EIF4A3,EMP2,FAM83D,FASN,FZD5,GAL,HK2,HMGB2,HRAS,IFRD2,IMPDH1,INPP4B,IRS2,ISOC2,KIF20A,LMNB2,LPAR3,LSM7,MTFP1,MTHFS,NCLN,NR4A1,OIP5,PDE9A,PNP,POLR3K,PPIF,PRC1,REEP4,SCARB1,SLC25A10,SLCO4A1,SMAD6,UNG,ZMYND19,ZNF367
CREIGHTON_ENDOCRINE_THERAPY_RESISTANCE_1	0.000260319	3.58449	528	706	42	21142	AFF3,AURKB,BZW2,CDC25B,CRISPLD2,DCTPP1,DHRS7,DOCK8,ELOVL2,EMP2,FBL,FBXL6,FKBP5,GPATCH4,GREB1,HMGB2,HSPB1,IGF1R,INPP4B,ISOC1,KIF20A,LDLRAD3,MCM4,MCM7,NR2C2AP,NRARP,NXT1,PABPC4,PPP1R35,PRLR,PTGER4,RMI2,RRS1,SNAI2,SRM,TMEM164,TTLL12,UNG,VGF,YDJC,ZBTB10,ZNF385B
PATIL_LIVER_CANCER	0.000274091	3.56211	747	706	53	21142	ASF1B,ATAD2,CDC25B,CDC45,CDC6,CDCA5,CDCA7,CDK1,CENPM,CENPW,CKLF,COL4A2,DEGS1,DEPDC1B,E2F1,ELOVL5,FEN1,GMNN,IL6R,LBR,LMNB2,MAD2L1,MAZ,MCM4,MCM5,MYBL2,NDRG1,NME1,NUDT1,PCNA,PKMYT1,PLK1,POLD1,PRIM1,PRIM2,RASSF3,RFC4,RRM2,S100P,SAC3D1,SLC39A1,SNRPB,SPARC,SRXN1,TMEM97,TRMT61A,TUBA3D,TXNRD1,TYMS,UCHL5,UCK2,VWF,ZWILCH
RIZ_ERYTHROID_DIFFERENTIATION	0.000282731	3.54863	77	706	14	21142	AURKB,CENPB,E2F1,EXO1,FEN1,HMGB2,MCM2,MCM4,MCM5,MCM7,MYBL2,POLD1,SMAD6,UHRF1
ZHANG_TLX_TARGETS_DN	0.000297212	3.52693	89	706	15	21142	CDC45,CENPN,EXO1,LRR1,LYAR,MCM10,MCM4,NCAPG,PRIM1,RAD51AP1,RAD54L,SHCBP1,TTK,TYMS,ZWILCH
WANG_RESPONSE_TO_ANDROGEN_UP	0.000337254	3.47204	29	706	9	21142	ACSL3,CENPN,CRLS1,KLK2,KLK3,MAF,TARP,UBE2J1,ZBTB10
WONG_MITOCHONDRIA_GENE_MODULE	0.000373021	3.42827	217	706	24	21142	BOP1,COX7B2,GCAT,GOT2,GSR,HINT2,MCAT,MCCC2,MRPL12,MRPS18A,MRPS18C,MRPS28,PPIF,SCO2,SEC61G,SLC25A32,TIMM10,TIMM13,TOMM40,TSFM,TSPO,UNG,UQCR10,UQCR11
MITSIADES_RESPONSE_TO_APLIDIN_DN	0.000377001	3.42366	249	706	26	21142	AGPAT5,AURKA,BICD2,BIRC5,CDT1,DHCR24,FBXO5,HNRNPAB,IMPA2,IMPDH1,LBR,MCM2,MCM4,MCM5,MFHAS1,MSH2,MYBL2,NCAPG,NCAPH,OSBPL8,RFC4,RRM2,SHCBP1,TMEM97,TUBA3D,TYMS
ACEVEDO_LIVER_TUMOR_VS_NORMAL_ADJACENT_TISSUE_UP	0.000444816	3.35182	863	706	58	21142	APEX2,ARL2BP,ATP6V0C,AURKA,BZW2,CENPN,CKLF,CORO1B,DCTPP1,DEGS1,DTYMK,EIF4A3,EXOSC5,F5,FADD,FAM83D,FKBP5,FRAT2,GMDS,GMNN,GNG10,GNMT,HMGB2,HSD17B11,IFRD2,KLF15,LYAR,MAFB,MCM4,MCM5,MRPS18C,NR2C2AP,NUDT1,ODC1,PAK1IP1,PDCD2L,PRC1,RFC4,RMI2,RNASEH2A,RPP21,RRS1,SDF2L1,SEC61G,SLC39A1,SNRPB,SPARC,SRXN1,SUPT4H1,TAGLN2,THAP11,TUBA1C,TXNRD1,TYMS,UCHL5,UCK2,VWF,ZMYND19
SCHUHMACHER_MYC_TARGETS_UP	0.000462806	3.3346	80	706	14	21142	BOP1,CYP51A1,FASN,HSPE1,NME1,ODC1,PRDX4,RCC1,RPIA,RRS1,SORD,SRM,TMEM97,UCK2
RHODES_UNDIFFERENTIATED_CANCER	0.000495976	3.30454	69	706	13	21142	BIRC5,CDC6,CDK1,HMGB2,MAD2L1,MCM2,MYBL2,NCAPH,NME1,NUDT1,PCNA,PRDX4,RFC4
EGUCHI_CELL_CYCLE_RB1_TARGETS	0.000583857	3.23369	23	706	8	21142	FEN1,HMGB2,KIF20A,MCM2,MCM4,MCM5,MCM7,NCAPG
CAFFAREL_RESPONSE_TO_THC_DN	0.000639408	3.19422	31	706	9	21142	CDK1,CYP51A1,EBP,PABPC4,PNP,PPIF,RRM2,TMEM109,UHRF1
KALMA_E2F1_TARGETS	0.000679358	3.1679	11	706	6	21142	FEN1,MCM2,PCNA,POLD1,RFC4,TYMS
HOFFMANN_LARGE_TO_SMALL_PRE_BII_LYMPHOCYTE_UP	0.000691906	3.15995	163	706	20	21142	AURKA,AURKB,CDC45,CDCA5,CDK1,DCTPP1,FEN1,HES1,HMGB2,KIF20A,MCM10,MCM5,NCAPH,NME2,PRC1,RAD51,RAD54L,RFC3,RRM2,TTK
LI_WILMS_TUMOR_VS_FETAL_KIDNEY_1_DN	0.000691906	3.15995	163	706	20	21142	AURKA,AURKB,BOP1,CDK1,ELOVL2,FEN1,GREB1,LMNB1,MAD2L1,MCM2,MSH2,NME1,PCNA,PRIM1,PRIM2,RNASEH2A,TTK,TXNRD1,UCK2,UNG
DAIRKEE_TERT_TARGETS_UP	0.000768155	3.11455	380	706	33	21142	ARPC4,BAX,BIRC5,CDC25B,DCTPP1,EBP,EMP2,FAM83D,GLRX2,GNB2,HTR3A,IFRD2,ISOC2,MPST,MRPL12,MRPL38,MRPS18A,MRPS2,MRPS24,NME1,PCYT2,POLD1,PPIF,PTGER4,RNF126,SH2B2,SLC2A3,TCP1,TERT,THAP11,TKT,UCK2,UQCR11
LIU_PROSTATE_CANCER_UP	0.000820602	3.08587	96	706	15	21142	ABCC4,ALDH1A3,BZW2,GALNT7,GGCT,GJB1,GLYATL1,GMDS,RAB3D,SLC19A1,SLC43A1,TARP,TRPM4,TSPAN13,UAP1
CHICAS_RB1_TARGETS_GROWING	0.000839016	3.07623	243	706	25	21142	CDC25B,CDCA7,DEPDC1,DHCR24,ELOVL2,GMNN,GPC6,IMPA2,KCNMA1,KCNN2,KIF20A,MCM2,MCM4,MCM7,MSH2,PRIM1,PRSS12,RAD51AP1,RFC4,RNASEH2A,TIFA,TMEM97,TNFAIP8,TTK,UHRF1
YANG_BCL3_TARGETS_UP	0.000868286	3.06134	364	706	32	21142	ACSL3,AKAP12,AURKA,AURKB,CDCA2,CDK1,CKLF,COASY,CROT,DEPDC1,E2F1,FAM83D,FASN,GBP2,GNA14,GNB4,HMGB2,IGF1,IL6R,KIF20A,MBOAT2,MYL9,NR4A1,PPARGC1A,PRC1,RAD51AP1,RRM2,SLC2A3,SOAT1,TGFBR2,TNFSF9,ZNF385B
WEST_ADRENOCORTICAL_TUMOR_UP	0.0008846	3.05325	294	706	28	21142	ANGPT2,AURKA,BICD2,BZW2,CDK1,CENPM,COL4A2,CYP51A1,DDX39A,EBP,FDFT1,GLRX2,GMNN,HMGB2,KIF20A,MCM2,NUDT1,PDE4B,PRC1,RRM2,SPARC,STOM,TCP1,TMED9,TMEM97,TUBA1C,WDR77,ZWILCH
WILCOX_RESPONSE_TO_PROGESTERONE_UP	0.000992852	3.00312	152	706	19	21142	CDC6,CDK1,CENPN,CYP51A1,EBP,FDFT1,HMGB2,HSD17B11,KIF20A,KLF5,KLF6,NCAPG,PRC1,RGS2,RRM2,SGK1,SHCBP1,TMEM97,TYMS
PEDERSEN_METASTASIS_BY_ERBB2_ISOFORM_7	0.0010098	2.99576	403	706	34	21142	ALDH1A3,CDC45,CENPM,CENPN,DSG2,DTYMK,E2F7,FAM110B,FAM43A,FXYD3,GNA14,HK2,KLF6,LMNB1,MAFK,MBOAT2,MCCC2,MCM4,MGLL,NCAPG,PHLDB2,PLOD2,PMEPA1,PRIM1,PRLR,RAB3B,RAD51AP1,RCC1,RNASEH2A,SAP30,SH2D3A,SLC35F2,TYMS,WWTR1
FERNANDEZ_BOUND_BY_MYC	0.00101531	2.9934	182	706	21	21142	AHSG,BAX,CEBPA,COL4A2,E2F1,GAL,HSPE1,IFRD2,IMPA2,LBR,MCM7,MYBL2,NME1,PER1,PKP1,RNASEH2A,RPL27AP6,SLBP,SLC19A1,SLC2A4,TERT
KEGG_PYRIMIDINE_METABOLISM	0.00107748	2.96759	98	706	15	21142	DTYMK,NME1,NME1-NME2,NME2,NME3,PNP,POLD1,POLE4,POLR3K,PRIM1,PRIM2,RRM2,TXNRD1,TYMS,UCK2
BIDUS_METASTASIS_UP	0.00108947	2.96278	214	706	23	21142	ASF1B,AURKA,BIRC5,CDC6,CDK1,CENPN,DEPDC1,EIF4A3,FEM1A,FEN1,GMNN,LMNB1,MAD2L1,MCM10,NCAPH,ODC1,PLOD2,PNMA1,RFC4,RRM2,SMS,SRSF9,TYMS
YU_MYC_TARGETS_UP	0.00113081	2.94661	42	706	10	21142	AURKA,BIRC5,CDK1,DCTPP1,GMNN,HMGB2,KIF20A,PCNA,PLK1,UCHL5
WU_CELL_MIGRATION	0.00121626	2.91497	184	706	21	21142	ADAMTS1,AGR2,AKAP12,CLDN7,COL4A2,F2RL1,FXYD3,KLF5,KRT19,LAD1,NNMT,PERP,PKP3,PTGER4,S100P,SNAI2,TGM2,THBS1,TM4SF1,TSPAN13,WWTR1
LABBE_WNT3A_TARGETS_UP	0.00121677	2.91479	112	706	16	21142	AKAP12,AURKA,CDK1,CEBPD,LMNB2,MCM4,PCNA,PER1,PRIM1,PTPN21,RRM2,SGK1,SHCBP1,TGM2,TMPRSS2,WDR77
FERRANDO_T_ALL_WITH_MLL_ENL_FUSION_DN	0.00133793	2.87357	87	706	14	21142	DDX39A,EIF3B,FKBP5,GOT2,HMGB2,LBR,LMNB1,MCM2,MCM5,PCNA,PKMYT1,PSMA6,SORD,TYMS
MORI_MATURE_B_LYMPHOCYTE_DN	0.00135144	2.8692	75	706	13	21142	CDC45,HES6,HMGB2,LMNB1,MCM5,NUDT1,PRDX4,PRPS1,RGS2,RRM2,SNRPB,TAX1BP3,UCK2
CHICAS_RB1_TARGETS_LOW_SERUM	0.00140452	2.85247	100	706	15	21142	CDCA7,CDT1,CENPW,CKLF,DEPDC1,LMNB1,LSM7,MCM4,MCM5,NNMT,RNASEH2A,SNRPB,TYMS,UQCR11,ZNF367
PAL_PRMT5_TARGETS_UP	0.00163104	2.78753	203	706	22	21142	ARL2BP,AURKB,FOXG1,GAS2,GCAT,GMNN,HMGB2,KIF20A,MCM2,MCM4,NME1,NUP35,ODC1,PNP,PRIM1,PRIM2,SLBP,SLC25A5,SLC38A4,TOMM5,TTK,UHRF1
CHARAFE_BREAST_CANCER_LUMINAL_VS_MESENCHYMAL_UP	0.00169278	2.7714	450	706	36	21142	AGR2,ALDH4A1,AZGP1,BLVRB,CACNG4,CADPS2,CEBPA,CLDN7,DNAJC1,EMP2,FAM174B,FRAT2,FXYD3,GET4,GGCT,JTB,KRT19,LAD1,MCCC2,MRPL41,NME3,NR2F6,PAQR4,PKP3,PLEKHA6,PPFIBP2,PRLR,RAB3D,S100P,SH2D3A,SPDEF,TBC1D30,TMPRSS2,TP53TG1,TRPM4,TSPAN13
REACTOME_SYNTHESIS_AND_INTERCONVERSION_OF_NUCLEOTIDE_DI_AND_TRIPHOSPHATES	0.00199368	2.70035	19	706	7	21142	DTYMK,GSR,NME1,NME1-NME2,NME2,RRM2,TXNRD1
REACTOME_LAGGING_STRAND_SYNTHESIS	0.00199368	2.70035	19	706	7	21142	FEN1,PCNA,POLD1,PRIM1,PRIM2,RFC3,RFC4
ZWANG_CLASS_3_TRANSIENTLY_INDUCED_BY_EGF	0.00206498	2.68508	222	706	23	21142	CEBPD,DPP4,DUSP1,ELL2,F2RL1,FKBP5,FOS,GALNT7,HES1,IGF1R,IPPK,KLF16,KLF4,MAFK,NDRG1,NR4A1,PER1,PFKFB3,PHLDB2,RGS2,RIPK4,TXNRD1,YRDC
REACTOME_EXTENSION_OF_TELOMERES	0.00234823	2.62926	27	706	8	21142	FEN1,PCNA,POLD1,PRIM1,PRIM2,RFC3,RFC4,TERT
REACTOME_POL_SWITCHING	0.00238254	2.62296	13	706	6	21142	PCNA,POLD1,PRIM1,PRIM2,RFC3,RFC4
LY_AGING_OLD_DN	0.00252009	2.59858	56	706	11	21142	CDC25B,DDX39A,FBL,HMGB2,MCM2,MYBL2,PCNA,PKMYT1,PLK1,TGFBR2,TYMS
KIM_WT1_TARGETS_DN	0.00267684	2.57238	459	706	36	21142	AURKA,AURKB,CDC42EP3,CDK1,CKLF,F2RL1,GMNN,GNAI1,HES1,HMGB2,HSD17B11,IMP3,KIF20A,MAD2L1,MGAT2,MZT2B,NCAPG,OIP5,ORC5,PERP,PEX10,PLOD2,PRIM2,RAD51AP1,RANGAP1,SAC3D1,SDF2L1,SHCBP1,SOAT1,STK17B,TBPL1,TBRG4,THAP11,TMEM160,TNFAIP8,TTK
SENGUPTA_NASOPHARYNGEAL_CARCINOMA_UP	0.00280425	2.55218	294	706	27	21142	ACTA2,ANGPT2,ATAD2,CDCA7,CDK1,COL4A2,DEPDC1B,FBN1,FKBP5,GBP1,GMNN,HMGB2,KCNMA1,MAD2L1,MCM4,NCAPG,PCNA,PRC1,RAD51AP1,RFC3,RRM2,SPARC,TTK,TYMS,UHRF1,UNG,ZNF367
LU_EZH2_TARGETS_UP	0.00299135	2.52413	295	706	27	21142	CLDN7,COMTD1,CSK,CYB561D2,DPM3,ENDOG,HES4,ISOC2,JOSD2,LSM7,MEX3D,NME2,NME3,NUDT1,PDXP,PEX16,PLEKHJ1,PRDX4,PRIM2,PUSL1,RPLP0P6,RPUSD1,SCAND1,STUB1,TM4SF1,TRIM47,UQCR10
BHAT_ESR1_TARGETS_NOT_VIA_AKT1_UP	0.00311367	2.50673	211	706	22	21142	CDC6,CYP4F11,DHRS2,GPATCH4,GREB1,HK2,LRG1,MCM10,MSMB,NXT1,PHLDA2,POP1,RPUSD1,SH2B2,SRM,TGM2,TRIM47,TRMT61A,TSKU,UHRF1,UNC5A,VWF
CROMER_METASTASIS_DN	0.00333407	2.47702	81	706	13	21142	ALDH4A1,CARD10,FXYD3,IMPA2,KLF5,LAD1,MALL,MRPS12,NOP16,NOP2,PHLDA2,PKP1,TTLL12
SHAFFER_IRF4_TARGETS_IN_ACTIVATED_B_LYMPHOCYTE	0.00333407	2.47702	81	706	13	21142	AURKA,CYP51A1,ELL2,FDFT1,GNG10,HK2,NDRG1,OSBPL8,PNP,TAGLN2,TERT,UAP1,UCK2
REACTOME_ASSOCIATION_OF_LICENSING_FACTORS_WITH_THE_PRE_REPLICATIVE_COMPLEX	0.00405156	2.39238	14	706	6	21142	CDC6,CDT1,E2F1,GMNN,ORC1,ORC5
ENK_UV_RESPONSE_KERATINOCYTE_UP	0.00477135	2.32136	530	706	39	21142	AP2S1,ATP6V0C,BLVRB,BTG1,CD4,CDKN1C,CEBPA,CRYAB,DHRS2,DUSP1,ELL2,ENDOG,F2RL1,FOS,GABARAP,GAL,GNB2,HSPB1,JTB,KLF5,KLK1,LAD1,MIF,MRPS12,NOP2,ODC1,PER1,PHLDA2,PKP3,PNP,PPIF,SGK1,SNRPB,STK17B,SUPT4H1,TAGLN2,TGM2,TNFSF9,TXNRD1
OLSSON_E2F3_TARGETS_DN	0.005114	2.29124	49	706	10	21142	CDK1,HMGB2,KRT80,LBR,MAD2L1,MYBL2,PCNA,PLK1,RRM2,THBS1
LY_AGING_PREMATURE_DN	0.00566504	2.2468	30	706	8	21142	CDC25B,DDX39A,FBL,HMGB2,MCM2,MYBL2,PKMYT1,TYMS
MATSUDA_NATURAL_KILLER_DIFFERENTIATION	0.00582856	2.23444	475	706	36	21142	CARD10,CDCA5,DSG2,DTYMK,ENDOD1,EPHA7,F2RL1,FEN1,FOS,GNB2,GPATCH4,HNRNPAB,HOMER2,IGF1,KLF4,KLF6,LDHB,MCM2,MCM5,MCM7,MRPL12,MRPL38,NCAPG,NOP2,PMEPA1,PPARGC1A,PRIM2,RAD54L,RRM2,RUNX2,SGK1,SPON2,TIMM13,TKT,WWC2,WWTR1
GRADE_COLON_CANCER_UP	0.00594948	2.22552	871	706	55	21142	ADAT3,APOL3,ATAD2,BCL2L12,CDCA7,CRLS1,DDX39A,ECSIT,EIF3B,ERH,FASN,FBL,FZD8,GMDS,GNB2,HMGB2,HSPBP1,HSPE1,JTB,LAD1,LMNB1,LYPLA2,MAFK,MCCC2,MCM5,MCM7,MIF,MRPL12,MZT2B,NME1,NOP16,ODC1,PABPC4,PCNA,PDCD2L,PERP,PFDN2,POLD1,PPIF,PUS1,RBX1,RCC1,RPP21,RPUSD1,RRM2,SLCO4A1,SNRPB,TAGLN2,TKT,TMED1,TOMM40,TRMT61A,TSPO,VILL,ZNF511
PENG_LEUCINE_DEPRIVATION_DN	0.00600227	2.22168	187	706	20	21142	AURKA,BYSL,DHCR24,EBP,ERH,FASN,HSPE1,LDHB,MCM4,MRPL12,MRPS12,NOP16,PNP,RCC1,RNF126,SRM,TCP1,TMEM109,TOMM40,UNG
CROONQUIST_NRAS_VS_STROMAL_STIMULATION_DN	0.00649933	2.18713	99	706	14	21142	ACTA2,AURKA,AURKB,CDC45,CDC6,CDK1,DUSP1,FOS,FSCN1,HES1,MCM2,MCM7,RAD51AP1,SPARC
RASHI_RESPONSE_TO_IONIZING_RADIATION_2	0.0065659	2.18271	127	706	16	21142	ACTA2,BAX,BTG1,CEBPD,CLDN7,KLF4,KLF5,KLF6,KRT19,MGLL,PDE4B,PKP3,RHOU,TAGLN2,THBS1,WWTR1
AMUNDSON_GAMMA_RADIATION_RESPONSE	0.00662605	2.17875	40	706	9	21142	AURKA,AURKB,CDC25B,CDK1,LBR,MAD2L1,PLK1,PRC1,TTK
DANG_MYC_TARGETS_UP	0.00745877	2.12733	143	706	17	21142	BAX,E2F1,ENDOG,FASN,HSPE1,IMPA2,MSH2,NME1,NME2,ODC1,PCNA,RCC1,SNRPB,SRM,TERT,TIMM10,TYMS
WANG_RESPONSE_TO_FORSKOLIN_UP	0.00863119	2.06393	23	706	7	21142	ACSL3,CENPN,CRLS1,KLK2,KLK3,TARP,UBE2J1
WINTER_HYPOXIA_METAGENE	0.00888281	2.05145	242	706	23	21142	ALDH1A3,ANGPT2,BTG1,CDK1,EIF4A3,ELL2,FOS,HK2,KRT14,KRT19,LDHB,LOX,MIF,NDRG1,NR4A1,ODC1,PFKFB3,PLOD2,PNP,SLC2A3,TBPL1,TGM2,THBS1
GARCIA_TARGETS_OF_FLI1_AND_DAX1_DN	0.00900064	2.04573	176	706	19	21142	BICD2,CDC6,CDCA5,CENPM,FEN1,GMNN,IGF1,INF2,LMNB1,MCM10,MYBL2,RCC1,RPIA,RRM2,SLC25A10,TIMM10,TRMT61A,TYMS,ZWILCH
SCHLOSSER_MYC_AND_SERUM_RESPONSE_SYNERGY	0.00959632	2.0179	32	706	8	21142	FRAT2,MRPL12,MRPS12,NCLN,RNF126,SRM,TAGLN2,TOMM40
CHIANG_LIVER_CANCER_SUBCLASS_UNANNOTATED_DN	0.00968694	2.01381	193	706	20	21142	BAX,CDK1,EPDR1,FEN1,GLUD2,GMNN,GNAI1,IMPA2,MAD2L1,MRPS12,MSH2,PCNA,PRDX4,PRPS1,RAD51AP1,RFC3,RFC4,RNASEH2A,SLC25A5,TYMS
RICKMAN_METASTASIS_DN	0.00993353	2.0029	261	706	24	21142	AKIRIN2,ALDH16A1,BICD2,CCM2,DAPK3,DOCK8,ENDOG,FXYD3,GBP1,GBP2,HRAS,LAD1,MALL,NDRG1,PERP,PKP1,PKP3,RNF126,SCO2,SLC19A1,TAGLN2,TNFAIP8,TNFSF9,TSPO
MENSSEN_MYC_TARGETS	0.0107579	1.96827	53	706	10	21142	EIF3B,HERC5,HSPE1,LDHB,MSH2,NME1,PPIF,SCARB1,SRM,TSPO
PENG_RAPAMYCIN_RESPONSE_DN	0.0108845	1.96319	245	706	23	21142	ALDH4A1,ATP6V0C,BYSL,DHCR24,EBP,EIF3B,FASN,GOT2,HSPE1,JTB,LDHB,MRPL12,MRPS12,NME1,NOP16,NPM3,PNP,PPIF,RCC1,SRM,TMEM109,TOMM40,UCK2
KOINUMA_TARGETS_OF_SMAD2_OR_SMAD3	0.0110543	1.95647	824	706	52	21142	AKIRIN2,ATAD2,BTG1,C1ORF116,CDC42EP3,CDC45,CDC6,CDCA4,CLDN7,DSG2,ELL2,F2RL1,GNG10,HES1,HSPE1,KLF6,KLF7,KRT14,KRT19,KRT80,LAD1,MAFK,MALT1,MBOAT2,MTFP1,MZT2B,NDRG1,NME1,NSUN5,NXT1,PERP,PHLDA2,PHLDB2,PLOD2,PMEPA1,PNMA1,PNP,PRKCH,PTPN21,RANGAP1,RIPK4,SLC35F2,SMAD6,SNAI2,TAGLN2,TGM2,THBS1,TM4SF1,TSKU,TXNRD1,UHRF1,WWTR1
REACTOME_ASSEMBLY_OF_THE_PRE_REPLICATIVE_COMPLEX	0.0115317	1.93811	65	706	11	21142	CDC6,CDT1,E2F1,GMNN,MCM2,MCM4,MCM5,MCM7,ORC1,ORC5,PSMA6
CHICAS_RB1_TARGETS_SENESCENT	0.012112	1.91679	572	706	40	21142	ACTG2,AKAP12,ALDH1A3,ATAD2,CDC6,CDCA7,CDT1,CKLF,DNAJC1,EMP2,FBL,FEN1,GAL,GMNN,HPSE,LMNB1,MCM2,MCM4,MCM5,MCM7,MSH2,ODC1,OSBPL8,PCNA,PRIM1,RASD1,RFC4,RNASEH2A,RRM2,SAC3D1,SLBP,SLCO4A1,SNRPB,TIFA,TMEM97,TNFAIP8,TYMS,UHRF1,WWTR1,ZNF367
FARMER_BREAST_CANCER_CLUSTER_2	0.0122985	1.91015	33	706	8	21142	ATAD2,KIF20A,MAD2L1,MCM4,NCAPG,PRC1,RRS1,SLC25A32
WONG_ADULT_TISSUE_STEM_MODULE	0.0131461	1.8812	721	706	47	21142	ADAMTS1,ANKH,ARPC1B,CDKN1C,CEBPD,CLEC7A,CMTM8,COL4A2,DUSP1,DUSP2,DUSP4,ELL2,ELOVL5,EPHA7,FOS,GBP1,GCAT,HLA-DMA,HOMER2,HPGD,KCND2,KCNMA1,KLF4,KLF6,LPAR3,MYL9,MYO1B,NKX3-1,NR4A1,PER1,PGLYRP2,PHLDA2,PHLDB2,PMEPA1,PPFIBP2,PTGER4,PTPN21,RAB20,RASD1,RGS2,RHOU,SPARC,STK17B,TGM2,THBS1,TRIM47,VWF
SHEPARD_CRUSH_AND_BURN_MUTANT_UP	0.0131697	1.88043	197	706	20	21142	BAX,BOP1,CRLS1,CYP51A1,DUSP4,FBL,FOS,HES1,HTRA2,IMP3,IMPDH1,MRPL12,MRPS18A,MRPS26,ODC1,PFKFB3,PHLDA2,RRS1,SGK1,TSFM
SWEET_KRAS_TARGETS_DN	0.0134254	1.87207	66	706	11	21142	BYSL,DUSP4,F2RL1,IRS2,LBR,MALL,MRPS12,ODC1,POLR3K,RGS2,RRM2
SIMBULAN_PARP1_TARGETS_DN	0.0153224	1.81467	17	706	6	21142	HMGB2,KRT14,PCNA,PRIM1,RANGAP1,TAGLN2
SHAFFER_IRF4_TARGETS_IN_PLASMA_CELL_VS_MATURE_B_LYMPHOCYTE	0.0155836	1.80733	67	706	11	21142	ELL2,F12,HSPB1,NDRG1,NR4A1,PABPC4,TERT,TXNDC5,UAP1,UBE2J1,UCK2
VANTVEER_BREAST_CANCER_METASTASIS_DN	0.0156681	1.80498	121	706	15	21142	ATAD2,AURKA,BIRC5,CDC25B,CENPN,COL4A2,DEGS1,DEPDC1,FBXO5,MAD2L1,NDRG1,PRC1,RFC4,SLC2A3,UCHL5
CHARAFE_BREAST_CANCER_LUMINAL_VS_MESENCHYMAL_DN	0.0180782	1.74284	460	706	34	21142	ABCC4,ACTA2,AKAP12,ALPK2,ANKH,BICD2,BIRC5,CDK6,CMTM7,COL4A2,DEPDC1,FBN1,FSCN1,GLIPR2,GNAI1,HSD17B11,LBH,LDHB,MALT1,NCAPG,NNMT,PABPC4,PHLDB2,PLK1,PRSS12,RGS2,RUNX2,SGK1,SNAI2,SOAT1,SPARC,TGFBR2,TYMS,WWTR1
MCDOWELL_ACUTE_LUNG_INJURY_UP	0.0184975	1.73289	45	706	9	21142	AKAP12,DUSP1,FOS,KLF6,LOX,LRG1,NR4A1,SERPIND1,TXNRD1
PILON_KLF1_TARGETS_DN	0.0186645	1.72898	1972	706	100	21142	ABCC4,ACADL,AGPAT5,AKAP12,ARL2BP,ARPC1B,BZW2,CARD10,CCM2,CDC42EP3,CDCA4,CDCA7,CDK6,CKLF,CLEC7A,CMTM7,DDX39A,DOCK8,DTYMK,E2F7,EIF4A3,ELOVL5,EXOSC5,F5,FBXL14,GALNT7,GNG10,GPATCH4,GRK6,GSR,HMGB2,HNRNPAB,HSD17B11,IGF1R,IL6R,IMPA2,INTS5,IQGAP2,ISOC1,KIF20A,KLF6,LBR,LDLRAD3,LMNB1,LRR1,LRRC59,MAD2L1,MCM4,MGAT2,MRPL41,MRPS2,MSH2,NCAPH,NCLN,NME1,ORC5,PDXP,PERP,PKMYT1,PNP,POLR3K,PRC1,PRIM1,PRIM2,RAB32,RAD5…
HELLER_HDAC_TARGETS_SILENCED_BY_METHYLATION_UP	0.018913	1.72324	461	706	34	21142	ACSL3,AKAP12,ALDH1A3,ALDH4A1,BTG1,CDKN1C,CNTNAP2,CRISPLD2,DHRS2,DLX2,DUSP1,DUSP2,FBN1,FGFR3,FOS,FOXG1,FSCN1,FZD5,GAL,HES1,HPGD,HPSE,HSD17B11,KCNN2,MAFB,NR4A1,ODC1,ORC5,PFKFB3,PHLDA2,PTGER4,SMPD3,TAOK3,TSPAN13
FARMER_BREAST_CANCER_APOCRINE_VS_LUMINAL	0.0189317	1.72281	326	706	27	21142	ACSL3,AKR1D1,ALDH1A3,APOD,AZGP1,CROT,CSGALNACT1,DHCR24,ELOVL2,FASN,FDFT1,FKBP5,GALE,GNMT,GREB1,HGD,IGF1R,KCNMA1,NDRG1,NME3,PNMA1,PNP,PPIF,STK39,THBS1,TMPRSS2,TRIM36
YAGI_AML_RELAPSE_PROGNOSIS	0.0196526	1.70658	35	706	8	21142	CDK6,GABARAP,HSPE1,LBR,NME1,RAB32,TKT,TSPO
REACTOME_UNWINDING_OF_DNA	0.0199986	1.699	11	706	5	21142	CDC45,MCM2,MCM4,MCM5,MCM7
TANG_SENESCENCE_TP53_TARGETS_DN	0.0211248	1.67521	57	706	10	21142	AURKB,BIRC5,CDK1,FBXO5,KIF20A,LMNB1,MAF,NCAPG,PRC1,TTK
NAKAMURA_CANCER_MICROENVIRONMENT_DN	0.0223215	1.65128	46	706	9	21142	AURKA,CDC6,CDCA2,FAM83D,HOMER2,RFC4,TCP1,TNS3,TXNRD1
CHEN_METABOLIC_SYNDROM_NETWORK	0.0228323	1.64145	1210	706	68	21142	ABCC4,ANG,ARPC1B,ARPC4,ASF1B,ATAD2,BIRC5,BLVRB,C3ORF80,CADPS2,CDT1,CKLF,CLEC7A,COMTD1,DOCK8,EBP,ENDOD1,F2RL1,FBN1,FEN1,FMN1,FOS,FSCN1,FZD5,GCNT1,GJB1,GMNN,GNMT,HK2,HTRA2,IQGAP2,JTB,KCNN2,LDHB,LOX,MAFB,MCM5,MFHAS1,MTFP1,MTHFS,MZT2B,NOSTRIN,OSBPL8,PCNA,PIK3AP1,PKMYT1,REEP4,RGS2,RPIA,SDF2L1,SLC25A10,SLC2A4,SLC43A1,SMS,SOAT1,SPARC,SRXN1,STK17B,TAGLN2,TAOK3,TAX1BP3,TBPL1,TGFBR2,TMEM164,TNFAIP8,TXNRD1,…
QI_HYPOXIA	0.0229857	1.63854	140	706	16	21142	CRYAB,CYP51A1,DUSP1,HES6,HK2,HPSE,KIF21B,KRT19,LOX,MBOAT2,NDRG1,PDXP,PLOD2,RNF126,SAP30,TNFSF9
FARMER_BREAST_CANCER_BASAL_VS_LULMINAL	0.0235345	1.62829	330	706	27	21142	AGR2,COX16,DHRS2,DHRS7,DNAJC1,FAM174B,FASN,GAL,GALNT7,GREB1,HSPB1,INPP4B,KLF5,LBR,LDHB,MCCC2,MCM10,MCM5,NME3,PKP1,PNMA1,PRDX4,RAD51AP1,SPDEF,TRIM2,TSPAN13,TTK
GRAESSMANN_APOPTOSIS_BY_DOXORUBICIN_UP	0.0238405	1.62268	1142	706	65	21142	AGPAT5,ALDH4A1,ATP6V0C,BTG1,C1QTNF1,CCDC86,CDC42EP3,CROT,DDX39A,DEGS1,DUSP9,E2F1,EAF2,EIF3B,ELOVL7,ENDOD1,ENDOG,ESRRA,FAM43A,FBXW9,FOS,FZD5,GGCT,HES6,HRAS,IL17D,IL6R,IPPK,JOSD2,KLF5,KRT14,LRR1,MAFB,MAFK,MGAT2,NOP16,NR4A1,PAK1IP1,PAQR4,PDXP,PERP,PHLDA2,PKP1,PKP3,PNP,PPIF,PTGER4,RAB43,RABGEF1,RIPK4,RPUSD1,SAC3D1,SAP30,SCARB1,SLC25A33,SLC45A3,SORD,SPON2,SRXN1,STK17B,TGM2,THBS1,TSPAN13,UFSP1,WNT7B
NUYTTEN_NIPP1_TARGETS_DN	0.0242004	1.61618	848	706	52	21142	ACSL3,AGR2,ALDH1A3,ARHGAP28,AURKA,CCDC86,CDK6,CDKN1C,DCTPP1,DDX39A,DEPDC1B,DHCR24,DPM3,FBXO5,FSCN1,GALNT7,GCAT,GNAI1,GRK6,HMGB2,HPSE,IL6R,IMPA2,INF2,KIF20A,KLF5,KREMEN2,LBR,LMNB1,MALL,MALT1,MBOAT2,MEX3D,NUDT8,PAK1IP1,PHLDA2,PRPS1,RAB3D,REEP4,RRM2,S100P,SMS,SPDEF,STK39,TMEM97,TMPRSS2,TNS4,TRIM2,TYMS,UHRF1,ZNF367,ZNF71
GEORGES_TARGETS_OF_MIR192_AND_MIR215	0.0246084	1.60892	893	706	54	21142	AGPAT5,ANG,ARL2BP,ASRGL1,ATAD2,C17ORF58,CADPS2,CDCA4,CKLF,CLN6,DEGS1,DEPDC1,DHCR24,EAF2,ELL2,ELOVL5,ENDOD1,EPDR1,FAM83D,FBN1,FBXO5,FEN1,FHDC1,FOS,GPR37,HES6,IGF1R,KIF20A,LMNB1,LMNB2,MAD2L1,MCM10,NCAPH,NKX3-1,ORC1,OSBPL10,OSBPL8,PABPC4,PERP,PRIM1,RAB3B,RAD51,RFC4,SAP30,SLC39A1,SOAT1,STK17B,TMEM164,TMTC2,TTK,UNG,WWC2,ZBTB10,ZNF385B
RODRIGUES_THYROID_CARCINOMA_ANAPLASTIC_UP	0.0289365	1.53855	722	706	46	21142	AKIRIN2,ATAD2,AURKA,AURKB,C3ORF80,CDC42EP3,CDK1,CDK6,DDX39A,DEPDC1,DSG2,E2F7,FEN1,GALE,GPR158,HK2,IMPDH1,KCNMA1,KRT80,LYAR,MAD2L1,MAGEA1,MATR3,MCM2,MCM4,MCM7,ORC5,OSBPL10,OSBPL8,PRIM2,RAB32,RAD51AP1,RCC1,RUNX2,SLCO4A1,SNRPB,STK17B,TGM2,TNFSF9,TRIM36,TTK,TXNRD1,UCK2,ZMYND19,ZNF367,ZWILCH
ELVIDGE_HYPOXIA_BY_DMOG_DN	0.0289428	1.53846	59	706	10	21142	ALDH4A1,CEBPA,CENPN,ODC1,POLR3K,PUS1,SDF2L1,SPDEF,SRM,WDR77
GARY_CD5_TARGETS_DN	0.0293958	1.53172	431	706	32	21142	ABT1,AFF3,BIRC5,DCTPP1,DTYMK,FBXO5,FEN1,GALNT7,GBP1,GMNN,GPATCH4,HLA-DMA,INTS5,MATR3,MGAT2,MRPS12,NME1,NOP2,OIP5,PAK1IP1,PNP,RFC3,RRM2,SDF2L1,SOAT1,TNFAIP8,TSFM,UCHL5,UHRF1,WDR77,YRDC,ZNF367
STEIN_ESR1_TARGETS	0.0309181	1.50979	85	706	12	21142	ATAD2,CDC6,FEN1,GREB1,MCM10,MCM2,MCM4,MCM5,PCNA,RFC4,SGK1,ZWILCH
REACTOME_METABOLISM_OF_NUCLEOTIDES	0.0315063	1.5016	72	706	11	21142	DTYMK,GSR,IMPDH1,NME1,NME1-NME2,NME2,PNP,RRM2,TXNRD1,TYMS,UCK2
LI_WILMS_TUMOR_ANAPLASTIC_UP	0.0317237	1.49862	19	706	6	21142	CDK1,NCAPH,RAD54L,RFC3,RFC4,TTK
MOHANKUMAR_HOXA1_TARGETS_UP	0.0333923	1.47635	414	706	31	21142	ARPC1B,ASF1B,BZW2,CDC6,CDK1,CLDN7,CLN6,CORO1B,DHRS2,E2F7,ELOVL2,ELOVL5,GAL,KLK4,LDHB,LRRC59,MAZ,MSH2,NOP2,PCNA,PLK1,PRLR,RCC1,RRM2,SHCBP1,TBRG4,TOMM40,TSKU,TUBA1C,WDR77,ZWILCH
COLINA_TARGETS_OF_4EBP1_AND_4EBP2	0.0339757	1.46883	356	706	28	21142	ABCC4,ADAMTS1,AKAP12,ASF1B,AURKB,BIRC5,BLVRB,CDC25B,CDT1,FBXO5,GBP1,GBP2,GMNN,KIF20A,NNMT,PERP,PLK1,PLOD2,PNP,PPFIBP2,RAD51,TGM2,THBS1,TIMM10,TM4SF1,TMEM97,TRIM54,TTK
SEITZ_NEOPLASTIC_TRANSFORMATION_BY_8P_DELETION_UP	0.0359916	1.4438	73	706	11	21142	ALDH1A3,CRISPLD2,GBP1,HERC5,HPSE,KLF4,MALL,PNP,PTGER4,SORD,ZFP36L2
FULCHER_INFLAMMATORY_RESPONSE_LECTIN_VS_LPS_UP	0.0362717	1.44043	579	706	39	21142	ACSL3,AGTRAP,BZW2,CKLF,CLEC7A,CSK,DCTPP1,DUSP4,FADD,FKBP5,FSCN1,GAL,GOT2,GSR,HOMER2,ISOC1,JAGN1,JTB,MCCC2,MRPS12,MRPS24,NDRG1,NME1,PHLDA2,PNP,POLE4,POLR3K,RRS1,SMAD6,SOAT1,SRXN1,TAGLN2,TARP,TGM2,TIMM10,TNFSF9,TXNRD1,YRDC,ZNF697
SHETH_LIVER_CANCER_VS_TXNIP_LOSS_PAM1	0.037598	1.42484	229	706	21	21142	APEX2,APLN,ARL2BP,CD320,CDCA5,CKLF,CRISP3,GGCT,GPC6,GREB1,HES1,HNRNPAB,KLF6,LOX,PLA1A,PTPN21,RRM2,SCARB1,SLC2A3,SPON2,TGM2
LI_AMPLIFIED_IN_LUNG_CANCER	0.0379197	1.42113	178	706	18	21142	FSCN1,HSPB1,HSPE1,JTB,KRT6C,LDHB,MALL,MIF,NME1,NME2,ODC1,PHLDA2,PRDX4,RPL17,S100P,TKT,TRIM2,TXNRD1
GENTILE_RESPONSE_CLUSTER_D3	0.0391202	1.4076	61	706	10	21142	CDC6,FEN1,LMNB1,NR2F6,RFC4,SLBP,TM4SF1,TNFAIP8,TTK,UNG
WESTON_VEGFA_TARGETS_3HR	0.0410175	1.38703	74	706	11	21142	ANGPT2,BCKDHA,F2RL1,NNMT,NR4A1,PDE4B,PNP,RANGAP1,RBX1,UNG,VWF
FURUKAWA_DUSP6_TARGETS_PCI35_DN	0.0410175	1.38703	74	706	11	21142	AURKA,AURKB,MCM4,MCM5,NCAPG,PHLDA2,PMEPA1,PRC1,PRIM1,RFC4,SHCBP1
NADERI_BREAST_CANCER_PROGNOSIS_UP	0.0450603	1.34621	50	706	9	21142	CDCA5,CENPN,EBP,EXO1,FADD,KIF20A,MYBL2,POLD1,UHRF1
YAMAZAKI_TCEB3_TARGETS_DN	0.0471258	1.32674	215	706	20	21142	AGR2,AGTRAP,AURKA,CDKN1C,CLDN7,DHCR24,DSG2,FDFT1,FZD5,IGF1R,KIF20A,KRT19,LBR,LDHB,MCCC2,MIF,MYBL2,SAP30,TUBA1C,UHRF1
TSAI_RESPONSE_TO_IONIZING_RADIATION	0.0498975	1.30192	149	706	16	21142	ARL2BP,BTG1,CDK1,CDK6,CDKN1C,COL4A2,DLX2,KLF4,KRT14,KRT19,MSH2,PCNA,PLK1,SGK1,TNFAIP8,TP53TG1
GOZGIT_ESR1_TARGETS_UP	0.0498975	1.30192	149	706	16	21142	CDC42EP3,CEBPA,CRISPLD2,CYP11A1,CYP4F8,DEGS1,DEPDC1,DHRS2,DUSP9,FOS,GNAI1,KRT14,ORC1,PTGER4,PTPN21,TNFAIP8
